1           **Co-chaperone involvement in knob biogenesis implicates host-derived**  
2                           **chaperones in malaria virulence.**

3  
4  
5 Mathias Diehl<sup>1</sup>, Sebastian Weber<sup>2</sup>, Marek Cyrklaff<sup>1</sup>, Cecilia P. Sanchez<sup>1</sup>, Carlo A. Beretta<sup>3, 4</sup>,  
6 Lena Roling<sup>5</sup>, Caroline S. Simon<sup>1</sup>, Julien Guizetti<sup>1</sup>, Matthias P. Mayer<sup>6</sup>, Jude M. Przyborski<sup>5\*</sup>

7  
8 <sup>1</sup>Parasitology, Centre for Infectious Diseases, Heidelberg University Hospital, Im Neuenheimer Feld 324, 69120  
9 Heidelberg, Germany; <sup>2</sup>Electron Microscopy Core Facility, Heidelberg University, Im Neuenheimer Feld 345, 69120  
10 Heidelberg, Germany; <sup>3</sup>Nikon Imaging Center at Heidelberg University, BioQuant BQ001 Im Neuenheimer Feld  
11 267, 69120, Heidelberg, Germany; <sup>4</sup>CellNetworks Math-Clinic at Heidelberg University, BioQuant BQ001 Im  
12 Neuenheimer Feld 267, 69120, Heidelberg, Germany; <sup>5</sup>Biochemistry and Molecular Biology, Justus Liebig  
13 University, Heinrich-Buff-Ring 26-32, 35392 Gießen, Germany; <sup>6</sup>Center for Molecular Biology of Heidelberg  
14 University (ZMBH), DKFZ-ZMBH-Alliance, Im Neuenheimer Feld 282, 69120, Heidelberg, Germany.  
15

16  
17  
18  
19  
20  
21  
22  
23  
24  
25  
26  
27 **Keywords**

28 *Plasmodium falciparum*, HSP40, HSP70, knobs, KAHRP, malaria, virulence, PfEMP1, co-  
29 chaperone, chaperone.

30  
31 **Abbreviations**

32 SLI, selection-linked integration; (i)RBC, (infected) red blood cell; PV(M), parasitophorous  
33 vacuole (membrane); RBCM, red blood cell membrane; PPM, parasite plasma membrane;  
34 BSD, blasticidin; NEO, neomycin; KAHRP, knob-associated histidine-rich protein; SEM,  
35 scanning electron microscopy; TEM, transmission electron microscopy; (r)STED, (rescue)  
36 stimulated emission depletion; NPP, new permeability pathways; IFA, immunofluorescence  
37 assay; EQT, equinatoxin; CSA, chondroitin-sulphate-A; MC, Maurer's clefts

38 **Abstract**

39 The pathology associated with malaria infection is largely due to the ability of infected human  
40 erythrocytes to adhere to a number of receptors on endothelial cells within tissues and organs.  
41 This phenomenon is driven by the export of parasite-encoded proteins to the host cell, the  
42 exact function of many of which is still unknown. Here we inactivate the function of one of these  
43 exported proteins, PFA66, a member of the J-domain protein family. Although parasites lacking  
44 this protein were still able to grow in cell culture, we observed severe defects in normal host  
45 cell modification, including aberrant morphology of surface knobs, disrupted presentation of  
46 the cytoadherence molecule PfEMP1, and a total lack of cytoadherence, despite the presence  
47 of the knob associated protein KAHRP. Complementation assays demonstrate that an intact  
48 J-domain is required for recovery to a wild-type phenotype and suggest that PFA66 functions  
49 in concert with a HSP70 to carry out host cell modification. Strikingly, this HSP70 is likely to be  
50 of host origin.

51 Taken together, our data reveal a role for PFA66 in host cell modification, implicate  
52 human HSP70 as also being essential in this process, and uncover a KAHRP-independent  
53 mechanism for correct knob biogenesis. Our observations open up exciting new avenues for  
54 the development of new anti-malarials.

55  
56 **Introduction**

57 *Plasmodium falciparum* causes the most severe form of malaria in humans, *malaria tropica*,  
58 responsible for over 200 million clinical cases and 400,000 deaths *per annum*, mainly in  
59 children under the age of 5 and mostly in sub-Saharan Africa<sup>1</sup>. The pathology associated with  
60 malaria infection is largely due to the ability of infected human erythrocytes to adhere to a  
61 number of receptors on endothelial cells within tissues and organs<sup>1</sup>. This cytoadherence  
62 results in reduced blood flow in the affected areas, hypoxia and (in cerebral malaria) increased  
63 intracranial pressure<sup>1,2</sup>. The phenomenon of cytoadherence results from parasite-induced host  
64 cell modification in which parasite-encoded proteins are transported to and exposed at the  
65 surface of the infected host cell, where they mediate endothelial binding and antigenic  
66 variation<sup>3-5</sup>. In addition to these surface proteins, parasites also encode, express, and export  
67 a large number of other proteins to the infected erythrocyte<sup>6-8</sup>. Many of these proteins are  
68 specific to *P. falciparum*, and their function is still not well understood, partly due to limitations  
69 in reverse genetic systems<sup>8-10</sup>.

70 Within the predicted 'exportome' are 19 proteins belonging to the family of J-domain  
71 proteins (JDPs, also called Hsp40s), and this exported family appears to be expanded in the  
72 Laveranian clade, suggesting important functions in these parasite species<sup>8,11</sup>. In other  
73 systems, HSP40s act as co-chaperones for HSP70, a protein family that lies at the heart of  
74 proteostasis and other essential cellular processes<sup>12</sup>. Previous studies have localised several  
75 members of the exported *Pf*HSP40 family to various structures within the infected erythrocyte,

76 including red blood cell plasma membrane, Maurer's clefts, knobs, and J-dots<sup>10,13,14</sup>. Knockout  
77 studies suggest that, although some of the exported HSP40s are essential, others can be  
78 deleted without any observable phenotype, and several can be deleted, resulting in aberrant  
79 cellular morphology, cytoadherence, and rigidity of infected erythrocytes, suggesting a  
80 potential role for this protein family in host cell modification and virulence characteristics<sup>10</sup>  
81 (Supplementary Table 1). One exported HSP40, PFA66 (encoded by *PF3D7\_0113700*,  
82 formerly *PFA0660w*), was previously localised to J-dots, novel structures within the infected  
83 erythrocyte containing further exported parasite-encoded HSP40s, an exported parasite-  
84 encoded HSP70 (*PfHsp70-x*), and a number of other exported proteins<sup>13,15,16</sup>. An earlier  
85 medium throughput knockout study failed to generate parasites deficient in PFA66, and  
86 therefore its function in the parasite's lifecycle remains elusive<sup>9</sup>.

87 In this study, we utilise selection-linked integration-targeted gene disruption (SLI-TGD)  
88 to generate parasites expressing a non-functional PFA66 truncation mutant and characterise  
89 the resulting parasite lines. We find that inactivation of PFA66 function leads to dramatic  
90 aberrations in host cell modification, especially in knob morphology, capacity for  
91 cytoadherence and surface exposure of the virulence factor PfEMP1. Our data suggest an  
92 important role for exported HSP40s in parasite pathogenicity. Additionally, our data strongly  
93 implicate residual human HSP70 in parasite-induced host cell modification.

94

## 95 **Results**

### 96 *Generation of PFA66 truncation and complementation cell lines*

97 Genetic manipulation via single crossover was performed using a selection-linked integration  
98 targeted gene disruption strategy<sup>17</sup> (Figure 1A). Integration of the plasmid would lead to the  
99 production of a GFP-tagged, truncated, non-functional PFA66 protein lacking the entire C-  
100 terminal substrate binding domain (SBD), referred to as dPFA. We transfected CS2 parasites  
101 that had previously been freshly selected for binding to chondroitin-sulphate-A as this binding  
102 phenotype would be essential for later characterisation<sup>18,19</sup>. Plasmid integration into the  
103 *PFA0660w/PF3D7\_0113700* locus was verified via PCR using primers designed to yield  
104 products upon integration of the plasmid into the genome via primers spanning the integration  
105 site (Figure 1A). Appearance of bands representing the 5' and 3' integration, as well as the  
106 disappearance of bands representing the endogenous *PFA0660w* locus, demonstrated  
107 specific integration of the plasmid into the genome (Figure 1B), yielding parasite line CS2 $\Delta$ PFA  
108 (referred to as  $\Delta$ PFA). Immunodetection using an  $\alpha$ -GFP antibody revealed the presence of  
109 dPFA::GFP fusion in cell lysates derived from  $\Delta$ PFA but not parental CS2 parasites (Figure  
110 1C). Together, this data indicated successful integration of the vector into the *PFA0660w* locus,  
111 leading to the production of a truncated product dPFA lacking the J-domain required for  
112 function. To verify that any aberrant phenotypes observed were due to a lack of PFA66 and  
113 not second site events, we generated a complementation line that expressed a full-length,

114 functional 3xHA (hemagglutinin)-tagged copy of PFA66 from an episome, under the control of  
115 Prom<sup>PFA66</sup>, referred to as  $\Delta PFA^{[PFA::HA]}$ . Expression of this complementation construct was  
116 verified by immunoblotting using  $\alpha$ -HA antibodies (Figure 1D).

117

118 *dPFA is soluble within the host cell cytosol*

119 Full-length PFA66 has previously been localised to the J-dots, and a follow up study suggested  
120 that the SBD of exported HSP40s is required for correct localisation<sup>13,20</sup>. As dPFA lacks the  
121 SBD, but still contains both an N-terminal signal peptide and a recessed PEXEL trafficking  
122 signal, we expect export of dPFA::GFP to the host cell<sup>6,7</sup>. Live cell imaging and  
123 immunofluorescence failed to detect dPFA, likely due to the low expression level of this protein.  
124 We therefore used equinatoxin (EQT) to selectively permeabilise the erythrocyte plasma  
125 membrane and allow sub-cellular fractionation of infected erythrocytes<sup>21,22</sup>. Immunodetection  
126 using antibodies against the compartment-specific markers SERP (parasitophorous vacuole),  
127 human Hsp70 (HsHSP70, red blood cell cytosol), aldolase (ALDO, parasite cytoplasm), and  
128 GFP reveals co-fractionation of dPFA with HsHSP70, verifying that dPFA::GFP is found in the  
129 host cell cytosol and furthermore that dPFA::GFP is found in the soluble phase and not in the  
130 membrane fraction as we have previously demonstrated for the full-length protein<sup>13</sup> (Figure  
131 S1A). Taken together, these data suggests that deletion of the SBD of PFA66 leads to a non-  
132 functional protein.

133

134 *Truncation of PFA66 affects novel permeability pathway (NPP) activity and confers a small  
135 growth advantage.*

136 Exported parasite proteins carry out a multitude of functions supporting the survival of *P.*  
137 *falciparum* parasites. One of these is the establishment of NPPs of the iRBC to support the  
138 uptake of essential nutrients<sup>23,24</sup>. To investigate a potential role of PFA66 in NPP activity, we  
139 used a sorbitol uptake / lysis assay, which revealed that erythrocytes infected with  $\Delta PFA$   
140 parasites show a significantly reduced sorbitol-induced lysis, implying a reduced NPP capacity  
141 (Figure S1B). To examine whether this reduction in NPP activity affects parasite viability,  
142 growth of both cell lines was compared over four growth cycles (~8 days) using flow cytometry.  
143 Surprisingly, a slight but significant growth advantage (calculated as below 1% advantage per  
144 cycle) of the truncation cell line compared to the parental cell line was observed (Figure S1C).

145

146 *Truncation of PFA66 causes deformed knob morphology.*

147 Knobs are electron-dense protrusions of the iRBC surface that help correctly present the major  
148 virulence factor PfEMP1, thus facilitating iRBC cytoadhesion and concomitantly increasing  
149 clinical pathology<sup>3-5,25,26</sup>. As exported HSP40s have previously been implicated in knob  
150 formation<sup>9,14</sup>, we used scanning electron microscopy to visualize knobs on the surface of CS2-

151 and  $\Delta PFA$ -infected erythrocytes. RBCs infected with the parental parasite line CS2 showed  
152 normal knob morphology, with an even distribution of small knobs over the entire surface of  
153 the infected cell (Figure 2A, S2A). Small variations in knob number and size are observed and  
154 are likely due to slightly different developmental stages of the parasite (compare 2B, C to S6A,  
155 B, D, E). In stark contrast, RBCs containing  $\Delta PFA$  displayed, in addition to a population of  
156 normal knobs, knobs with extremely aberrant morphology. These knobs varied in their  
157 aberration, and included vastly extended knobs (Figure 2A), wide tall knobs (Figure S2), wide  
158 flat knobs (Figure S2), and branched knobs (Figure 2A). Some of the elongated knobs reached  
159 lengths of  $\sim 0.7 \mu\text{m}$ . To distinguish these abnormal structures from classical knobs, we will refer  
160 to them as “*mentula*” (plural *mentulae*). For purposes of quantification, we counted and  
161 classified knobs/*mentulae* to one of three classes I) normal/ small knobs II) abnormal/enlarged  
162 *mentulae* III) deformed/elongated *mentulae*. This analysis revealed a significant reduction in  
163 the overall number of knobs/*mentulae* in  $\Delta PFA$ -infected RBCs when compared to wild type  
164 CS2 (CS vs  $\Delta PFA$ , Figure 2B). 22% of surface structures exhibited abnormal morphology in  
165  $\Delta PFA$ -infected RBCs (Figure 2C). Interestingly, we occasionally observed extended knoblike  
166 structures on the surface of RBCs infected with CS2 parasites (Figure 2C) at a level of 2%. As  
167 a control, we complemented  $\Delta PFA$  function with full-length PFA66 expressed from an episome,  
168 and both density and morphology of *mentulae*/knobs returned to wild type levels (Figure 2B,  
169 C).

170 Transmission electron microscopy (TEM) on thin sections prepared from RBCs infected  
171 with either WT CS2 or  $\Delta PFA$  parasites substantiated our observations. CS2 parasites  
172 produced clearly defined electron-dense knob structures of a restricted diameter and height  
173 above the erythrocyte plasma membrane, whereas  $\Delta PFA$  displayed *mentulae* extending from  
174 the red blood cell surface into the external medium (Figure 2D, S3). The lumen of these  
175 *mentulae* was often extremely electron dense, hinting at their molecular relation to knobs.  
176 Occasionally we observed membrane-bound structures extending from RBCs infected with  
177 CS2 parasites, but the lumen of these structures was not electron dense; therefore, these  
178 structures cannot be classed as *mentulae*. Although not highly abundant in either sample, the  
179 morphology of Maurer’s clefts appeared comparable in both samples (data not shown).

180

### 181 *Electron-dense material is a scaffold for mentula structure*

182 Intrigued by the apparent electron-dense core of *mentulae* in TEM, we conducted electron  
183 tomography analysis on thick sections prepared from  $\Delta PFA$ -infected erythrocytes. Subsequent  
184 3D reconstruction and surface rendering of the distinct densities in tomographic volumes  
185 allows a high-fidelity glimpse into the fine structure of *mentulae*. This analysis verified the  
186 presence of electron-dense material within and at the base of *mentulae* (Figure 2E). This  
187 material fills out the entire *mentula* rather than only lining the structure, and the distribution of

188 this material closely matched the structure of the *mentula*. In some cases (3 out of 10), the  
189 electron-dense material at the base of the *mentula* was connected via a thin bridge to the  
190 material inside of the *mentula* (Figure 2F, Supplementary Video 1).

191

#### 192 *KAHRP distribution is changed in $\Delta PFA$ -infected erythrocytes*

193 KAHRP has long been held to be a crucial knob-associated protein as parasites lacking this  
194 protein no longer form knobs<sup>25,26</sup>, and KAHRP truncations show varying aberrant knob  
195 phenotypes<sup>27</sup>. For this reason we investigated the localisation of KAHRP in RBCs infected with  
196 our  $\Delta PFA$  cell line. Indirect immunofluorescence (IFA) on fixed cells demonstrated a punctate  
197 distribution of KAHRP in cells infected with both wild type and mutant cell lines (Figure 3A).  
198 Automated analysis with a self-generated ImageJ plugin revealed that KAHRP +ve structures  
199 were equally numerous but statistically larger in diameter in RBCs infected with  $\Delta PFA$  than  
200 with CS2 (Figure 3B, C). Localisation of other exported parasite proteins via IFA showed no  
201 significant difference between the cell lines (Figure S4). To exclude that the KAHRP result was  
202 due to non-specific binding of antibodies, for example, we episomally expressed a  
203 KAHRP::mCherry fusion in both wild-type and  $\Delta PFA$  parasites. Surprisingly, considering the  
204 relatively low resolution of live cell epifluorescence microscopy, (but preserving membrane  
205 integrity and cell morphology), KAHRP +ve structures could be seen to emerge from the  
206 surface of RBCs infected with  $\Delta PFA$ , possibly representing *mentulae* (Figure 3D,  
207 Supplementary Videos 2A-D). Based on the previous result, we wanted to understand whether  
208 KAHRP is directly associated with *mentulae* and used immunogold labelling of thin sections  
209 derived from CS2 and  $\Delta PFA$  iRBCs to localise KAHRP. Although we encountered high  
210 background staining of the RBC cytosol in both cases, analysis revealed considerably more  
211 label was associated with knobs/*mentulae* than with the cytosolic background (Figure 3E, F).  
212 Analysis of the location of the KAHRP label in relation to the length of the knob/*mentula* or the  
213 closeness to the RBC membrane (RBCM) showed no difference between WT and mutant, or  
214 between knob/*mentula* morphologies (Figure S5A, B). To gain more insight into the nature of  
215 the KAHRP +ve structures, we paired membrane shearing with immunolabelling and STED  
216 (stimulated emission depletion<sup>28</sup>) microscopy to study the nature of the KAHRP +ve structures  
217 observed above. RBCs infected with CS2 or  $\Delta PFA$  were allowed to bind to a cover slip,  
218 hypotonically lysed to obtain access to the internal leaflet of the RBC plasma membrane, fixed,  
219 immunodecorated using an  $\alpha$ -KAHRP antibody, and imaged via STED microscopy. This  
220 technique allows super-resolution visualisation of KAHRP +ve structures from the luminal side  
221 of the erythrocyte plasma membrane and can be used to monitor the assembly of KAHRP into  
222 knobs (and in this case, *mentulae*). This analysis revealed a punctuate distribution of KAHRP  
223 beneath the membrane of RBCs infected with both wild type and mutant  $\Delta PFA$  cells. Although  
224 the data initially suggests that there are more KAHRP +ve structures in membranes from

225  $\Delta PFA$ , automated counting and measurement shows that this impression is likely to be  
226 imparted due to a higher mean size of KAHRP +ve objects rather than an actual increase in  
227 the absolute number of objects (Figure 3G, H, I). KAHRP +ve structures from  $\Delta PFA$ , as well  
228 as being larger, also appear by eye to have a lower circularity, although we were not able to  
229 substantiate this with image analysis. This might be in part due to the differences in morphology  
230 between knobs and *mentulae*.

231

232 *Mentulae contain ring/tubelike KAHRP structures but only small amounts of actin.*

233 To further investigate the relation of KAHRP with *mentula* we used rSTED (rescue-stimulated  
234 emission depletion<sup>29</sup>) to image both RBCs infected with CS2 or  $\Delta PFA$  parasites episomally  
235 expressing KAHRP::mCherry as above (Figure S5C). Infected cells were treated with RFP  
236 booster to amplify the mCherry signal, fluorescently labelled wheat germ agglutinin (WGA) to  
237 label the RBC glycocalyx (delineating the RBC membrane, RBCM), and phalloidin to stain host  
238 cell actin (Figure 4).

239 Line scan analysis reveals that *mentulae* are bounded by the RBCM. In most cases,  
240 KAHRP is found between the RBCM and the actin cytoskeleton, and the KAHRP signal also  
241 extends into the central cavity of the *mentulae*. Distribution of host actin closely follows that of  
242 WGA, apart from at the base of *mentulae* where it follows a path below the KAHRP staining.  
243 Fortuitous sectioning of several membrane-bounded *mentulae* extending from the RBC  
244 reveals a ring of KAHRP staining lining the luminal face of the *mentula*. Phalloidin staining was  
245 absent in this case, although it was associated with a shorter *mentula* (Figure 4, see Figure  
246 S5D for CS2 cell line).

247

248 *Chelation of membrane cholesterol but not actin depolymerisation or glycocalyx degradation*  
249 *causes reversion of the mutant phenotype in  $\Delta PFA$ .*

250 A number of lipid- or protein-dependent mechanisms can induce the initiation of curvature of  
251 biological membranes and stabilisation of the resulting structures<sup>30</sup>. The *mentulae* we observe  
252 here extend up to 0.7  $\mu\text{m}$  from the surface of the red blood cell and appear stable enough that  
253 we were able to observe them in live cell imaging. To understand how such structures can be  
254 generated, we treated erythrocytes infected with  $\Delta PFA$  parasites with cytochalasin-D (cyto-D)  
255 to depolymerise actin, methyl- $\beta$ -cyclodextrin (MBCD) to chelate membrane cholesterol, or the  
256 glucosidases hyaluronidase (HA) and neuraminidase (NA) to degrade RBC glycocalyx.  
257 Following treatment, cells were fixed and prepared for SEM, followed by image acquisition and  
258 analysis. Neither cyto-D nor HA/NA treatment caused a statistically significant reduction in the  
259 number of *mentulae* in cells infected with  $\Delta PFA$  (Figure S6A, B, C, D, E). Treatment with  
260 MBCD, while not causing a total reversion of *mentulae* to knobs, did cause a statistically

261 significant alteration in the observed type of *mentulae*, with a decrease in the number of  
262 deformed, elongated *mentulae*, and an increase in abnormal, enlarged *mentulae*.

263

264 *PFA0660w truncation results in negligible cytoadhesion and aberrant PfEMP1 presentation.*

265 As previously mentioned, mature stage infected *P. falciparum* iRBCs develop additional  
266 adhesive capabilities to cells of the host, and this process underlies *P. falciparum*  
267 pathogenicity<sup>1</sup>. IRBC cytoadherence to purified ligands can be assessed with a binding  
268 assay<sup>18</sup>. Prior to genetic manipulation we selected our parasite population for expression of  
269 the *var2CSA* variant of PfEMP1 by repeatedly binding them to chondroitin sulphate-A (CSA)<sup>19</sup>.  
270 We chose to use the CS2 strain of *P. falciparum* as this strain stably expresses *var2CSA*<sup>18</sup>. A  
271 static cytoadherence assay against immobilised CSA demonstrated that, in direct comparison  
272 to the parental CS2 strain,  $\Delta PFA$  exhibits massively reduced levels of binding (Figure 5A).  
273 Although all experiments were carried out on parasites that had not been maintained in culture  
274 for extended time periods (to avoid switching to another *var*/PfEMP1 variant), we wanted to  
275 verify that  $\Delta PFA$  still expressed PfEMP1<sup>var2csa</sup>. We therefore used flow cytometry on intact  
276 iRBCs using antisera specific against VAR2CSA (a kind gift of Benoît Gamain) to verify  
277 VAR2CSA expression and surface exposure. On erythrocytes infected with  $\Delta PFA$ , surface  
278 expression of VAR2CSA was reduced 60% compared to wild type parasites (Figure 5B, Figure  
279 S6F for histograms). Immunofluorescence (IFA) using the same antisera on fixed cells  
280 demonstrated that both CS2 and  $\Delta PFA$  express VAR2CSA to similar levels, with punctuate  
281 staining distributed across the host cell. A control IFA on cells infected with 3D7 strain parasites  
282 that had not been selected for VAR2CSA expression showed only background fluorescence,  
283 verifying the specificity of the result (Figure S6G).

284

285 *Complementation of PFA66 function requires an intact J-domain.*

286 HSP40s such as PFA66 are known interactors and regulators of HSP70s<sup>11,12,31</sup>, and HSP70-  
287 independent functions of HSP40s are rare. The J-domain of HSP40s is crucial both for  
288 recruitment of the partner HSP70 and stimulating the ATPase activity of the HSP70 partner<sup>31</sup>.  
289 Having shown above that we can achieve functional complementation via episomal expression  
290 of a full-length copy of PFA66, we were interested to know whether a functional J-domain (and  
291 hence a functional interaction with a HSP70) is required for phenotypic complementation. To  
292 this end, we expressed in the  $\Delta PFA$  parasite line a full-length copy of PFA66 with a H111Q  
293 amino acid replacement converting the HPD motif of the J-domain into the non-functional QPD  
294 sequence (Figure S6H) and assayed knob/*mentula* morphology and density as a surrogate for  
295 all other phenotypic assays. While expression of full-length PFA66 was able to revert the  
296 mutant knob phenotype (Figure 2B, C), similar expression of the non-functional full-length



297 protein failed to complement the wild-type phenotype (Figure 5C, D) in either density or  
298 morphology of knobs/*mentulae*.

299

300

301 **Discussion**

302 Although it has long been recognised that malaria parasites export a substantial number of  
303 proteins to their host cell, the mature human erythrocyte, the function of many of these proteins  
304 remains unknown<sup>6,7,10</sup>. *P. falciparum* exports a larger number of proteins to the host cell than  
305 related species, and one family that is highly represented amongst this expansion is that of J-  
306 domain proteins (Hsp40s)<sup>8</sup>. A previous medium-throughput study identified the exported Type  
307 II Hsp40 PFA66 as likely to be essential and resistant to inactivation via double-crossover  
308 integration<sup>9</sup>. In this study, we have used selection-linked integration (SLI)<sup>17</sup> to generate  
309 parasites expressing a severely truncated form of PFA66. This strategy deletes the entire  
310 substrate-binding domain of the expressed protein, resulting in a non-functional truncation  
311 mutant that is incapable of carrying out its biological function, and may well exhibit a dominant  
312 negative effect. The resulting parasites are highly viable but exhibit severe abnormalities in  
313 host cell modification.

314 Parasite growth following truncation of PFA66 was slightly higher than that of wild type  
315 CS2 parasites, this effect only becoming evident after four growth cycles. A similar effect was  
316 previously observed in a  $\Delta GEXP07$  parasite line; however, the significance of this result  
317 remains unclear as the reduction in metabolic burden by the loss of only one gene/protein is  
318 likely to be negligible<sup>32</sup>. Lysis of infected erythrocytes in a sorbitol uptake assay was also  
319 slightly reduced, implying either a reduction in novel permeation pathway activity, or potentially  
320 an increase in host cell stability via mechanical means. As a reduced NPP activity would be  
321 expected to lead to slower, not faster, parasite growth, we interpret this to be the result of  
322 increased robustness of the erythrocyte plasma membrane through an unknown mechanism.

323 The most striking result of our study was the observation that, in the  $\Delta PFA66$  cell line,  
324 normal knob biogenesis was significantly inhibited with regard to both knob density and  
325 morphology. Although earlier knockout studies have observed a reduction in knob formation,  
326 or slight alteration in knob morphology, to our knowledge ours is the first study to demonstrate  
327 such a dramatic alteration in knob structure upon inactivation of a single gene<sup>9,32</sup>. Indeed, so  
328 different are the structures we observe to classic knobs that we suggest calling them *mentula*  
329 to distinguish them from the 'normal' surface extensions. *Mentulae* differ from knobs both in  
330 their size/length, reaching up to 0.7 $\mu$ m from the erythrocyte surface. Additionally, *mentulae*  
331 that split into separate branches can be observed. KAHRP, a protein known to be required for  
332 correct knob formation, can be localised to *mentulae*, although its distribution (based on live  
333 cell imaging, immunofluorescence, and membrane shearing paired with STED microscopy)  
334 seems to be different from that observed in cells infected with wild type parasites. Several  
335 studies suggest that KAHRP is integrated into higher order assemblies during parasite  
336 development, eventually resulting in a ring structure underlying the knob<sup>33,34</sup>. Deletions in  
337 specific KAHRP domains lead to less incorporation into such structures and also appear to

338 influence the generation of sub-knob spiral structures of unknown molecular composition<sup>34</sup>.  
339 The possibility exists that KAHRP, while being necessary for correct knob formation, is itself  
340 not the major structure-giving component but merely serves as a scaffold for assembly of  
341 further higher order molecular structures, which themselves generate the necessary vector  
342 force to allow membrane curvature and push the knobs above the surface of the erythrocyte.  
343 KAHRP has been proposed to be especially vulnerable to misfolding due to its unusual amino  
344 acid composition, which would make it a likely client for chaperones / cochaperone systems<sup>14</sup>.  
345 Following this logic, if PFA66 is involved in the assembly of KAHRP into higher order  
346 assemblies, interruption of this process could cause knock-on misassembly of the spiral and  
347 therefore aberrant knob structures. Although we were not able to visualise spiral structures at  
348 the base of *mentulae*, our observed phenotype could be explained by runaway lengthening of  
349 such a spiral structure (Figure 6). Indeed, the electron density we observed on tomograms is  
350 consistent with a high molecular weight structure as a form-giving scaffold for the formation of  
351 *mentulae*. Within the resolution limit of our study, KAHRP itself appears to line the inner leaflet  
352 of the membrane-bounded *mentulae* and is thus unlikely to itself be a major component of the  
353 electron dense core of the *mentulae*. The action of host actin is known to be required for the  
354 generation of knobs<sup>34</sup>; however, although we could successfully visualise actin below the  
355 erythrocyte plasma membrane, it appears to be largely excluded from *mentulae* and thus  
356 cannot be responsible for maintaining the form of these structures, a view supported by the  
357 lack of action of cyto-D on *mentula* structure. Similarly, enzymatic removal of the erythrocyte  
358 glycocalyx had no effect on *mentulae*, excluding a role for this in membrane shaping. Chelation  
359 of membrane cholesterol via treatment with MBCD did cause change in the morphology of  
360 *mentulae*, but not a complete reversion to normal knob structures. Removal of cholesterol from  
361 biological membranes has been observed to cause an increase in membrane stiffness<sup>35,36</sup>, and  
362 this may explain the morphological reversion upon MBCD treatment, with a stiffer membrane  
363 being more resistant to the pushing force within the *mentulae*. Alternatively, removal of  
364 cholesterol and subsequent breakdown of so-called lipid rafts may interfere with the higher  
365 order organisation of membrane-bound factors involved either directly in membrane curvature  
366 or required for coordination of proteins internal to the *mentulae* that generate force. Taken  
367 together, our data strongly implies that both knobs and *mentulae* contain a so far unknown  
368 component, likely proteinaceous, which is required for force generation, subsequent  
369 membrane curvature, and resulting morphology. Interruption of correct assembly of this factor  
370 leads to aberrations in knob formation, eventually leading to the appearance of *mentulae*. Our,  
371 and others', data implicates KAHRP as having a role in this process, but it is unlikely to be the  
372 only structural protein involved.

373 In other systems, HSP40s, through their role as a regulator of HSP70 chaperone  
374 activity, have been shown to have a role in both assembly and disassembly of protein

375 complexes<sup>37</sup>, and it is tempting to suggest that the phenotype we observe here is due to  
376 incorrect complex assembly. Alternatively, PFA66 may be required for the correct transport of  
377 accessory proteins required for complex formation such as those proposed in a recent study<sup>34</sup>,  
378 and thus play an indirect role in correct assembly of high-molecular weight complexes. In  
379 support of this hypothesis, PFA66 is known to associate with J-dots, highly mobile structures  
380 within the infected erythrocyte that are also known to contain a number of HSP70s<sup>13,15,16,20</sup>. It  
381 is also feasible that PFA66 is required for the disassembly of incorrectly folded or assembled  
382 knob protein complexes and that our knockout reveals so far unknown quality control  
383 mechanisms.

384         Knobs are required for correct presentation of the major virulence factor *PfEMP1*, and  
385 high affinity binding of such to endothelial receptors<sup>38</sup>. Although previous studies suggested  
386 that KAHRP and *PfEMP1* formed a 'precytoadherence complex' at the Maurer's clefts<sup>39</sup>, later  
387 evidence suggest strongly that *PfEMP1* is incorporated only into knobs once they have been  
388 at least partly formed<sup>34,40</sup>. Erythrocytes infected with  $\Delta PFA66$  parasites showed a 63%  
389 reduction in knob/*mentulae* density and a 10-fold increase in the frequency of abnormal knob  
390 phenotype, and we observed an almost total lack of cytoadherence in iRBC infected with  
391  $\Delta PFA66$  parasites. This data strongly supports the view that, even in the normal knobs present,  
392 less *PfEMP1* was correctly presented and could take part in cytoadherence. Flow cytometry  
393 determined an almost 60% drop in cell surface recognition of the VAR2CSA variant of *PfEMP1*,  
394 although immunofluorescence suggests that both cell lines express similar amounts of this  
395 protein. The total loss of cytoadherence may be the consequence of several distinct factors:  
396 a) less total surface *PfEMP1*, b) fewer knobs with correctly loaded *PfEMP1*, and c) a significant  
397 number of aberrant knobs/*mentulae*. Moreover, we cannot exclude that *PfEMP1*, which needs  
398 to be correctly folded to bind specific receptors, does not assume the correct tertiary structure  
399 due to the lack of the necessary chaperone/co-chaperone system.

400         As previously mentioned, HSP40s generally act in concert with members of the HSP70  
401 family<sup>12</sup>. The erythrocyte is known to contain significant amounts of residual human HSP70s<sup>41</sup>  
402 and additionally a parasite-encoded HSP70, *PfHSP70-X*<sup>15</sup>. We have previously demonstrated  
403 that a knockout of *PfHSP70-X* leads to a reduction in virulence characteristics, including  
404 cytoadherence<sup>42</sup>. Significantly, however, iRBCs infected with  $\Delta 70-x$  parasites were covered  
405 with normal knob structures at a density comparable to that of the wild type<sup>42</sup>. Hence, although  
406 both knockouts showed defects in virulence functions, the mutant phenotype of iRBCs infected  
407 with  $\Delta PFA66$  is distinct and significantly more dramatic than that in iRBCs infected with  $\Delta 70-x$   
408 parasites. PFA66 has been reported to undergo a functional interaction with *PfHSP70-X*,  
409 HsHSP70, and HsHSC70<sup>43,44</sup>. Considering the difference in phenotype between  $\Delta 70-x$  and  
410  $\Delta PFA66$ , here we must conclude that, if a HSP70 is involved, it is more likely to be of human  
411 rather than parasite origin. We cannot formally exclude that PFA66 functionally interacts with

412 both human and parasite HSP70 homologues and that the phenotype we observe is a  
413 combination of the effect on both chaperones, but the balance of probabilities suggests that  
414 morphological abnormalities observed in this current study are largely due to an interruption of  
415 functional PFA66-*HsHSP70*/HSC70 interactions.

416 The J-domain of HSP40s contains a characteristic HPD motif that is required both for  
417 binding and ATPase activation of partner HSP70s<sup>37</sup>. As the unlikely possibility existed that our  
418 observed phenotype was due to a HSP70-independent function of PFA66, we carried out  
419 complementation analysis with a full-length copy of PFA66 expressed from an episome, or a  
420 copy containing a H111Q mutation that renders the J-domain inactive. As only the wild type  
421 protein was able to complement the mutant knob phenotype, we conclude that the effects we  
422 observed upon PFA66 truncation are due to either a dominant-negative effect of the truncated  
423 protein on proper functioning of the *HsHSP70* chaperone system within the host erythrocyte,  
424 or an effect due to lack of co-chaperone activity via deletion of an essential functional domain  
425 (SBD) of the HSP40. Either way the results support *HsHSP70* involvement. A potential role for  
426 residual human HSP70 in host cell modification and parasite virulence has been suggested for  
427 almost 20 years<sup>45</sup>, but to our knowledge our current study is the first to provide strong  
428 experimental evidence implicating human HSP70s in these processes.

429 To conclude, in this study we show data suggesting that correct biogenesis of knobs in  
430 malaria-infected erythrocytes is a complex process necessitating a number of proteins, the  
431 molecular identity of some of which remains enigmatic. Our data suggests that KAHRP, while  
432 obviously required for knob generation, may not directly provide a scaffold for knob structure.  
433 More importantly, our data also reveals that residual human HSP70 within the infected  
434 erythrocyte is involved in parasite-driven host cell modification processes. To our knowledge,  
435 this is the first time a host cell protein has been implicated in parasite virulence, and this  
436 observation opens up exciting new avenues for the development of new anti-malarials.

437

## 438 **Materials & Methods**

### 439 *Vector construction*

440 The ~1kbp PFA66 targeting region was amplified using the primers PFA\_NotI\_F and  
441 PFA\_MluI\_R and cloned into pSLI<sup>TGD</sup> using NotI-HF and MluI (NEB)<sup>17</sup> (kind gift of Tobias  
442 Spielmann). The complementation plasmid PFA::HA was generated by excising the  
443 *PFA0660w* coding sequence and promoter from the plasmid pAD-A660-GFP<sup>13</sup> with the  
444 restriction enzymes NotI-HF and BssHII and cloning them into pARL-PFF1415c-3xHA (BSD,  
445 a kind gift of Sarah Charnaud). The resulting plasmid was subsequently used to generate the  
446 QPD::HA plasmid via QuickChange PCR using PFA\_Quick\_QPD\_F and PFA\_Quick\_QPD\_R  
447 primers. Upon verification of the QPD mutation, the insert consisting of the *PFA0660w*  
448 promoter and coding sequence was re-cloned into the same vector to avoid mutation due to

449 the PCR step. The KAHRP::mCherry plasmid was generated by amplifying mCherry with the  
450 primers mCherry\_AvrII\_F and mCherry\_XmaI\_R and cloning them into a pre-existing plasmid  
451 pARL2\_KAHRP containing the native KAHRP promoter and KAHRP coding sequence (kind  
452 gift of Cecilia Sanchez). All primers are listed in Supplementary Table 2A.

453

#### 454 *Cell culture methods*

455 *P. falciparum* parasites were cultured at 37°C with 90% N<sub>2</sub>, 5% CO<sub>2</sub>, and 5% O<sub>2</sub> according to  
456 established methods<sup>46</sup>. Parasites were maintained at a haematocrit of ~5% in A<sup>+</sup> or O<sup>+</sup> human  
457 blood obtained from the blood banks in Marburg and Heidelberg, respectively, and maintained  
458 with RPMI1640 (Gibco) containing 200 µM hypoxanthine, 160 µM neomycin (Sigma Aldrich)  
459 and 10% human plasma. Parasitaemias were evaluated from smears prepared from the blood  
460 cultures, which were fixed in 100% MeOH and stained with ddH<sub>2</sub>O/10% Giemsa solution  
461 (Merck). Parasites were transfected with 150 µg of plasmid and treated with 2.5nM WR99210  
462 (HS lines) or 12µg/ml blasticidin (Invivo Gen). Transfectants were propagated in fresh O<sup>-</sup> blood  
463 using RPMI1640 (Gibco) with 5% human plasma, 5% albumax II (Invitrogen) and other  
464 additives as above until parasites re-appeared<sup>47</sup>. Selection-linked integration was performed  
465 according to Birnbaum et al.<sup>17</sup>. Briefly, following reappearance after the initial transfection,  
466 parasites were treated with 400 µg/ml G418 (Thermo Fisher Scientific) until resistant parasites  
467 were observed. Parasites were synchronized before experiments using sorbitol-induced  
468 lysis<sup>48</sup>. For this mixed-culture parasites were incubated in 5% sorbitol for 10 min, washed with  
469 parasite culture medium and re-cultivated. Routine selection for CSA-binding parasites was  
470 performed according to standard protocols<sup>19</sup>. Late-stage parasites were enriched via gelatine  
471 flotation for 1 hr / 37 °C<sup>49</sup>. Subsequently parasites were resuspended in cytoadhesion media  
472 (pH 7.2, prepared from RPMI1640 powder (Life technologies)) and incubated in cell culture  
473 flasks pre-treated with CSA (PBS pH 7.2/1 mg/ml CSA overnight / 16 °C and blocked with PBS  
474 pH 7.2 / 1% BSA) for 1 hr / 37 °C. After careful washing with cytoadhesion media, the  
475 remaining bound parasites were washed off and re-seeded.

476

#### 477 *Chemical or enzymatic treatment of iRBCs*

478 For these experiments, magnetically purified iRBCs (~1 x 10<sup>7</sup> per condition) were used.  
479 Cytochalasin-D treatment was carried out with RPMI1640 / 10µm cyto-D for 10 min at RT,  
480 incubation with RPMI1640/10 mM MBCD was performed for 20 min at 37 °C, RPMI1640/  
481 30mU neuraminidase or RPMI1640/30U hyaluronidase treatments were performed for 1 hr at  
482 37 °C. Following treatment, samples were processed for SEM.

483

484

485 *MACS purification*

486 For some protocols, late-stage parasites were magnetically purified using a VARIOMACS with  
487 a CS-column<sup>50</sup>. Briefly ~1 ml packed erythrocytes (~10% parasitaemia) were applied to a CS  
488 column, washed with PBS / 3% BSA and finally eluted into PBS.

489

490 *Microscopy methods*

491 Live cell imaging was performed on DAPI-stained (1 ng/ml) parasites using a Zeiss Axio-  
492 Observer microscope and AxioVision software. For immunofluorescence assays, parasites  
493 were fixed on microscopy slides using 90% acetone / 10% MeOH for 5 min / -20 °C. Cells were  
494 then blocked using PBS / 3% BSA for 1 hr / RT and incubated in a humid chamber overnight  
495 with the primary antibody diluted in blocking buffer (for antibodies see Supplementary Table  
496 2B). On the next day, PBS-washed slides were treated with the secondary antibody, diluted  
497 1:2,000 in blocking buffer for 2 hr / RT, subsequently washed again, DAPI stained (0.1 ng/ml  
498 in PBS), and imaged using a Zeiss Axio-Observer microscope and AxioVision software.  
499 RSTED imaging was carried out as recently reported in great detail<sup>51</sup>. Wheat germ agglutinin  
500 Alexa Fluor® 488 conjugate (Thermo Fisher) was used according to the supplier's  
501 specification. Phalloidin-Atto 647N (Thermo Fisher) was diluted 1:500 in PBS and incubated  
502 for 30 min / RT to stain the actin cytoskeleton. RFP booster ATTO594 was used 1:200/2hr/RT  
503 to enhance RFP fluorescence. IMInspector imaging software (Abberior Instruments GmbH) was  
504 used for image capture and deconvolution of STED images, and AxioVision software was used  
505 for other acquisitions. Images were processed using ImageJ. Brightness and contrast was  
506 adjusted to reduce background and enhance visibility. No gamma adjustments were applied  
507 to any images, and all data is presented in accordance with the recommendations of Rossner  
508 and Yamada<sup>52</sup>.

509

510 *Protein-based methods*

511 Protein extracts were prepared from  $1 \times 10^8$  MACS-purified iRBCs. These were resuspended  
512 in PBS and boiled in Laemmli loading buffer for 10 min at 99 °C. Soluble fractions were  
513 separated via centrifugation (4 °C, 35,000 g) and an equivalent of  $1 \times 10^7$  parasites loaded  
514 onto each well of 12% acrylamide gels. Equinatoxin (EQT) treatment and fractionation of  
515 MACS-purified iRBCs was carried out as described by Külzer et al.<sup>22</sup> but using 4 haemolytic  
516 units of EQT at RT for 6 min. Western blot / immunodetection was carried out via semi-dry  
517 blotting, blocking in 5% milk powder (1 hr / RT), incubation with primary (overnight / 4 °C),  
518 washing three times with PBS, incubation with the secondary (2 hr / RT) antibody in blocking  
519 buffer, washing three times with PBS, and visualization via x-ray films. Antibody sources and  
520 dilutions can be found in Supplementary Table 2B.

521

522 *Membrane shearing*

523 For investigation of the internal structure of the RBC cytoskeleton membrane shearing was  
524 employed according to established protocols<sup>34,53</sup>. Briefly, a (3-aminopropyl)triethoxysilane-  
525 treated ibidi dish was incubated with 150  $\mu$ l PBS / 1 mM with Bis(sulfosuccinimidyl)suberate for  
526 30 min / RT, washed with PBS, and incubated with 150  $\mu$ l ddH<sub>2</sub>O / 0.1 mg/ml  
527 erythroagglutinating phytohaemagglutinin for 2 hr / RT. Dishes were rinsed three times with  
528 PBS and quenched using PBS / 0.1 M glycine for 15 min / RT. Approximately  $1 \times 10^7$  MACS-  
529 purified iRBCs were added and incubated for 3-4 hr, washed, and sheared using 5P8-10 buffer  
530 (5 mM Na<sub>2</sub>HPO<sub>4</sub> / NaH<sub>2</sub>PO<sub>4</sub>, 10 mM NaCl, PH 8), while angling the dish at 20°. Samples were  
531 then blocked using 150  $\mu$ l of PBS / 1% BSA, treated with the primary  $\alpha$ -KAHRP antibody  
532 overnight / 4 °C in blocking buffer, washed three times, incubated with the secondary  $\alpha$ -  
533 mouse<sup>ATTO549</sup> for 1 hr / RT in blocking buffer, and finally washed three times before imaging via  
534 rSTED.

535

536 *Sorbitol lysis*

537 Assessment of NPP activity was carried out according to Baumeister et al.<sup>23</sup>. For each  
538 measurement, 40  $\mu$ l of 2% trophozoite culture was resuspended in 150  $\mu$ l lysis buffer (290 mM  
539 sorbitol, 5 mM HEPES, pH 7.4) and incubated for 30 min / 37 °C. Remaining RBCs were then  
540 pelleted at 1,600 g / 2 min, and the absorbance of the resulting supernatant was measured at  
541 OD<sub>570nm</sub>. Samples were then compared to a total lysis control, which was generated in parallel  
542 using ddH<sub>2</sub>O instead of lysis buffer.

543

544 *Flow cytometry*

545 Infected erythrocytes were fixed for 24 hr at 4 °C using PBS/4% paraformaldehyde/0.0075%  
546 glutaraldehyde and stained with DAPI (1 ng/ml) prior to analysis with a BD Canto. In the growth  
547 experiments, both cell lines were diluted after every growth cycle with the same factor in order  
548 to support parasite growth. Both parasite cell lines were seeded with the same parasitaemia  
549 and diluted after every cycle to avoid 'crashing' the culture. Parasitaemias were measured  
550 before and after every dilution by staining of iRBCs with DAPI and flow cytometry. For staining  
551 VAR2CSA on the RBC surface, live parasites were incubated with VAR2CSA antiserum (11P,  
552 rabbit, a kind gift of Benoit Gamain) and  $\alpha$ -rabbit-Cy3 for 30 min each and then processed for  
553 flow analysis as detailed above.

554

555 *Cytoadherence*

556 IRBC cytoadhesion to immobilized CSA was investigated using MACS-purified late-stage  
557 parasites<sup>18</sup>. Parasites were applied in cytoadhesion media (pH 7.2, made from RPMI1640  
558 powder (Life technologies) to pre-treated spots (PBS pH 7.2/1 mg/ml CSA overnight at 16 °C,



559 blocked with PBS pH 7.2/1% BSA for 1 hr at RT), and then washed with PBS on a Petri dish.  
560 After incubation for 1 hr at RT, non-bound parasites were washed away using cytoadhesion  
561 medium. Parasites were then fixed using PBS/2% glutaraldehyde for 2 hr at RT and stained  
562 with PBS/10% Giemsa for 10 min at RT prior to imaging using a Zeiss Axio Observer  
563 microscope and counting with Ilastik<sup>54</sup> and ImageJ software.

564

#### 565 *Electron microscopy*

566 For scanning electron microscopy, purified parasites were fixed using PBS /1% glutaraldehyde  
567 for at least 30 min at RT. After washing, parasites were bound to coverslips (pre-treated with  
568 0.1% polylysine for 15 min at RT), washed again, and dehydrated in acetone gradients (ddH<sub>2</sub>O,  
569 25% Ac, 50% Ac, 75% Ac, 100% Ac, 10 min each) followed by critical point dehydration and  
570 coating with 5 nm Pd-gold. Cells were imaged using a Zeiss Leo 1530 electron microscope  
571 (SE2 detector, ~12,000 x magnification)<sup>55</sup>. For transmission electron microscopy, parasites  
572 were fixed in 100 mM Ca-cacodylate/4% paraformaldehyde/ 2% glutaraldehyde, embedded in  
573 Spurr and cut into ~70 nm sections. Some samples were fixed using 100 mM Ca-  
574 cacodylate/4% paraformaldehyde/ 0.1% glutaraldehyde and treated according to the  
575 Tokuyasu protocol for immunogold labelling of KAHRP using an  $\alpha$ -KAHRP (rabbit) antibody  
576 and a secondary goat  $\alpha$ -rabbit-gold conjugated antibody<sup>56</sup>. Some of the EM sections were used  
577 without post-contrasting, while some were post-contrasted using 3% uranyl acetate and  
578 ddH<sub>2</sub>O/0.15 M Na-citrate/0.08 M Pb(NO<sub>3</sub>)<sub>2</sub> / 0.16 M NaOH for 2 min. Imaging was performed  
579 using a Jeol 1400 microscope operating at 80kV. For electron tomography ~350 nm thick  
580 sections were used and examined in a TECNAI F30, 300kV FEG, FEI electron microscope  
581 (EMBL Heidelberg). The resulting tomograms were processed using IMOD, ETOMO image/  
582 volume processing software package and the Amira, volume visualisation software.

583

#### 584 *Statistics*

585 Statistics were calculated in prism or Excel using unpaired, two-tailed t-tests.  $p > 0.05$  = non-  
586 significant (ns); \* $p < 0.05$ ; \*\* $p < 0.01$ ; \*\*\* $p < 0.00$ . Figures show mean and standard deviation.

587

#### 588 *ImageJ Macro*

589 The ImageJ/Fiji<sup>57</sup> macro computes the local maxima of each object on the smooth probability  
590 map (PM) images generated by ilastik pixel classification. The ilastik<sup>54</sup> pixel classification  
591 workflow is used to reduce the background in the images and enhance the foreground pixels.  
592 To segment each object in the probability map images the local maxima is used as a seed for  
593 the 3D watershed plugin. The approach allows to separate close objects and creates masks  
594 that are used to measure size and intensity on the raw images. The macro and the instructions  
595 on how to use it can be found at:

596 [https://github.com/cberri/2D\\_AutomatedObjectsDetection\\_ImageJ-Fiji](https://github.com/cberri/2D_AutomatedObjectsDetection_ImageJ-Fiji)

597

## 598 **Acknowledgements**

599 We wish to thank the blood banks of the University Hospitals in Giessen and Marburg for  
600 providing blood. Further we would like to thank the EMCF at the University of Heidelberg (in  
601 particular Stefan Hillmer), the EMCF of EMBL Heidelberg (Yannick Schwab and Martin  
602 Schorb), the FACS core facility at the ZMBH (Monika Langlotz), as well as the Infectious  
603 Diseases Imaging Platform (Vibor Laketa) and Marie Freudenberg. We thank Tim Bostick for  
604 proofreading. This work was supported by DFG grant PR1099/8-1 to JMP.

605

## 606 **References**

- 607 1. Miller, L. H., Baruch, D. I., Marsh, K. & Doumbo, O. K. The pathogenic basis of malaria.  
608 *Nature* **415**, 673-679 (2002).
- 609 2. Newton, C. R. et al. Intracranial pressure in African children with cerebral malaria. *Lancet*  
610 **337**, 573-576 (1991).
- 611 3. Baruch, D. I. et al. Cloning the *P. falciparum* gene encoding PfEMP1, a malarial variant  
612 antigen and adherence receptor on the surface of parasitized human erythrocytes. *Cell*  
613 **82**, 77-87 (1995).
- 614 4. Su, X. Z. et al. The large diverse gene family var encodes proteins involved in  
615 cytoadherence and antigenic variation of *Plasmodium falciparum*-infected erythrocytes.  
616 *Cell* **82**, 89-100 (1995).
- 617 5. Smith, J. D. et al. Switches in expression of *Plasmodium falciparum* var genes correlate  
618 with changes in antigenic and cytoadherent phenotypes of infected erythrocytes. *Cell* **82**,  
619 101-110 (1995).
- 620 6. Hiller, N. L. et al. A host-targeting signal in virulence proteins reveals a secretome in  
621 malarial infection. *Science* **306**, 1934-1937 (2004).
- 622 7. Marti, M., Baum, J., Rug, M., Tilley, L. & Cowman, A. F. Signal-mediated export of  
623 proteins from the malaria parasite to the host erythrocyte. *J Cell Biol* **171**, 587-592 (2005).
- 624 8. Sargeant, T. J. et al. Lineage-specific expansion of proteins exported to erythrocytes in  
625 malaria parasites. *Genome Biol* **7**, R12 (2006).
- 626 9. Maier, A. G. et al. Exported proteins required for virulence and rigidity of *Plasmodium*  
627 *falciparum*-infected human erythrocytes. *Cell* **134**, 48-61 (2008).
- 628 10. Maier, A. G., Cooke, B. M., Cowman, A. F. & Tilley, L. Malaria parasite proteins that  
629 remodel the host erythrocyte. *Nat Rev Microbiol* **7**, 341-354 (2009).
- 630 11. Botha, M., Pesce, E. R. & Blatch, G. L. The Hsp40 proteins of *Plasmodium falciparum*  
631 and other apicomplexa: regulating chaperone power in the parasite and the host. *Int J*  
632 *Biochem Cell Biol* **39**, 1781-1803 (2007).
- 633 12. Qiu, X. B., Shao, Y. M., Miao, S. & Wang, L. The diversity of the DnaJ/Hsp40 family, the  
634 crucial partners for Hsp70 chaperones. *Cell Mol Life Sci* **63**, 2560-2570 (2006).
- 635 13. Külzer, S. et al. Parasite-encoded Hsp40 proteins define novel mobile structures in the  
636 cytosol of the *P. falciparum*-infected erythrocyte. *Cell Microbiol* **12**, 1398-1420 (2010).
- 637 14. Acharya, P., Chaubey, S., Grover, M. & Tatu, U. An exported heat shock protein 40  
638 associates with pathogenesis-related knobs in *Plasmodium falciparum* infected  
639 erythrocytes. *PLoS One* **7**, e44605 (2012).
- 640 15. Külzer, S. et al. *Plasmodium falciparum*-encoded exported hsp70/hsp40 chaperone/co-  
641 chaperone complexes within the host erythrocyte. *Cell Microbiol* **14**, 1784-1795 (2012).
- 642 16. Zhang, Q. et al. Proteomic analysis of exported chaperone/co-chaperone complexes of  
643 *P. falciparum* reveals an array of complex protein-protein interactions. *Sci Rep* **7**, 42188  
644 (2017).

- 645 17. Birnbaum, J. et al. A genetic system to study *Plasmodium falciparum* protein function.  
646 *Nat Methods* **14**, 450-456 (2017).
- 647 18. Beeson, J. G. et al. *Plasmodium falciparum* isolates from infected pregnant women and  
648 children are associated with distinct adhesive and antigenic properties. *J Infect Dis* **180**,  
649 464-472 (1999).
- 650 19. Reeder, J. C. et al. The adhesion of *Plasmodium falciparum*-infected erythrocytes to  
651 chondroitin sulfate A is mediated by *P. falciparum* erythrocyte membrane protein 1. *Proc*  
652 *Natl Acad Sci U S A* **96**, 5198-5202 (1999).
- 653 20. Petersen, W. et al. J-dot targeting of an exported HSP40 in *Plasmodium falciparum*-  
654 infected erythrocytes. *Int J Parasitol* **46**, 519-525 (2016).
- 655 21. Jackson, K. E. et al. Selective permeabilization of the host cell membrane of *Plasmodium*  
656 *falciparum*-infected red blood cells with streptolysin O and equinatoxin II. *Biochem J* **403**,  
657 167-175 (2007).
- 658 22. Külzer, S., Bittl, V. & Przyborski, J. M. Fractionation of Plasmodium-infected human red  
659 blood cells to study protein trafficking. *Methods Mol Biol* **1270**, 71-80 (2015).
- 660 23. Baumeister, S. et al. Evidence for the involvement of *Plasmodium falciparum* proteins in  
661 the formation of new permeability pathways in the erythrocyte membrane. *Mol Microbiol*  
662 **60**, 493-504 (2006).
- 663 24. Ginsburg, H., Krugliak, M., Eidelman, O. & Cabantchik, Z. I. New permeability pathways  
664 induced in membranes of *Plasmodium falciparum* infected erythrocytes. *Mol Biochem*  
665 *Parasitol* **8**, 177-190 (1983).
- 666 25. Crabb, B. S. et al. Targeted gene disruption shows that knobs enable malaria-infected  
667 red cells to cytoadhere under physiological shear stress. *Cell* **89**, 287-296 (1997).
- 668 26. Pologé, L. G., Pavlovec, A., Shio, H. & Ravetch, J. V. Primary structure and subcellular  
669 localization of the knob-associated histidine-rich protein of *Plasmodium falciparum*. *Proc*  
670 *Natl Acad Sci U S A* **84**, 7139-7143 (1987).
- 671 27. Rug, M., Prescott, S. W., Fernandez, K. M., Cooke, B. M. & Cowman, A. F. The role of  
672 KAHRP domains in knob formation and cytoadherence of *P. falciparum*-infected human  
673 erythrocytes. *Blood* **108**, 370-378 (2006).
- 674 28. Klar, T. A., Jakobs, S., Dyba, M., Egnér, A. & Hell, S. W. Fluorescence microscopy with  
675 diffraction resolution barrier broken by stimulated emission. *Proc Natl Acad Sci U S A* **97**,  
676 8206-8210 (2000).
- 677 29. Staudt, T. et al. Far-field optical nanoscopy with reduced number of state transition  
678 cycles. *Opt Express* **19**, 5644-5657 (2011).
- 679 30. McMahan, H. T. & Boucrot, E. Membrane curvature at a glance. *J Cell Sci* **128**, 1065-  
680 1070 (2015).
- 681 31. Laufen, T. et al. Mechanism of regulation of hsp70 chaperones by DnaJ cochaperones.  
682 *Proc Natl Acad Sci U S A* **96**, 5452-5457 (1999).
- 683 32. McHugh, E. et al. Role of *Plasmodium falciparum* Protein GEXP07 in Maurer's Cleft  
684 Morphology, Knob Architecture, and *P. falciparum* EMP1 Trafficking. *mBio* **11**, (2020).
- 685 33. Watermeyer, J. M. et al. A spiral scaffold underlies cytoadherent knobs in *Plasmodium*  
686 *falciparum*-infected erythrocytes. *Blood* **127**, 343-351 (2016).
- 687 34. Looker, O. et al. The knob protein KAHRP assembles into a ring-shaped structure that  
688 underpins virulence complex assembly. *PLoS Pathog* **15**, e1007761 (2019).
- 689 35. Byfield, F. J., Aranda-Espinoza, H., Romanenko, V. G., Rothblat, G. H. & Levitan, I.  
690 Cholesterol depletion increases membrane stiffness of aortic endothelial cells. *Biophys*  
691 *J* **87**, 3336-3343 (2004).
- 692 36. Kwik, J. et al. Membrane cholesterol, lateral mobility, and the phosphatidylinositol 4,5-  
693 bisphosphate-dependent organization of cell actin. *Proc Natl Acad Sci U S A* **100**, 13964-  
694 13969 (2003).
- 695 37. Fan, C. Y., Lee, S. & Cyr, D. M. Mechanisms for regulation of Hsp70 function by Hsp40.  
696 *Cell Stress Chaperones* **8**, 309-316 (2003).
- 697 38. Horrocks, P. et al. PfEMP1 expression is reduced on the surface of knobless *Plasmodium*  
698 *falciparum* infected erythrocytes. *J Cell Sci* **118**, 2507-2518 (2005).
- 699 39. Wickham, M. E. et al. Trafficking and assembly of the cytoadherence complex in  
700 *Plasmodium falciparum*-infected human erythrocytes. *EMBO J* **20**, 5636-5649 (2001).

- 701 40. Sanchez, C. P. et al. Single-molecule imaging and quantification of the immune-variant  
702 adhesin VAR2CSA on knobs of *Plasmodium falciparum*-infected erythrocytes. *Commun*  
703 *Biol* **2**, 172 (2019).
- 704 41. Bryk, A. H. & Wiśniewski, J. R. Quantitative Analysis of Human Red Blood Cell Proteome.  
705 *J Proteome Res* **16**, 2752-2761 (2017).
- 706 42. Charnaud, S. C. et al. The exported chaperone Hsp70-x supports virulence functions for  
707 *Plasmodium falciparum* blood stage parasites. *PLoS One* **12**, e0181656 (2017).
- 708 43. Day, J., Passecker, A., Beck, H. P. & Vakonakis, I. The *Plasmodium falciparum* Hsp70-  
709 x chaperone assists the heat stress response of the malaria parasite. *FASEB J* **33**,  
710 14611-14624 (2019).
- 711 44. Daniyan, M. O., Boshoff, A., Prinsloo, E., Pesce, E. R. & Blatch, G. L. The Malarial  
712 Exported PFA0660w Is an Hsp40 Co-Chaperone of PfHsp70-x. *PLoS One* **11**, e0148517  
713 (2016).
- 714 45. Banumathy, G., Singh, V. & Tatu, U. Host chaperones are recruited in membrane-bound  
715 complexes by *Plasmodium falciparum*. *J Biol Chem* **277**, 3902-3912 (2002).
- 716 46. Trager, W. & Jensen, J. B. Human malaria parasites in continuous culture. *Science* **193**,  
717 673-675 (1976).
- 718 47. Wu, Y., Sifri, C. D., Lei, H. H., Su, X. Z. & Wellems, T. E. Transfection of *Plasmodium*  
719 *falciparum* within human red blood cells. *Proc Natl Acad Sci U S A* **92**, 973-977 (1995).
- 720 48. Lambros, C. & Vanderberg, J. P. Synchronization of *Plasmodium falciparum* erythrocytic  
721 stages in culture. *J Parasitol* **65**, 418-420 (1979).
- 722 49. Goodyer, I. D., Johnson, J., Eisenthal, R. & Hayes, D. J. Purification of mature-stage  
723 *Plasmodium falciparum* by gelatine flotation. *Ann Trop Med Parasitol* **88**, 209-211 (1994).
- 724 50. Staalsoe, T., Giha, H. A., Dodoo, D., Theander, T. G. & Hviid, L. Detection of antibodies  
725 to variant antigens on *Plasmodium falciparum*-infected erythrocytes by flow cytometry.  
726 *Cytometry* **35**, 329-336 (1999).
- 727 51. Mehnert, A. K., Simon, C. S. & Guizetti, J. Immunofluorescence staining protocol for  
728 STED nanoscopy of Plasmodium-infected red blood cells. *Mol Biochem Parasitol* **229**,  
729 47-52 (2019).
- 730 52. Rossner, M. & Yamada, K. M. What's in a picture? The temptation of image manipulation.  
731 *J Cell Biol* **166**, 11-15 (2004).
- 732 53. Shi, H. et al. Life cycle-dependent cytoskeletal modifications in *Plasmodium falciparum*  
733 infected erythrocytes. *PLoS One* **8**, e61170 (2013).
- 734 54. Berg, S. et al. ilastik: interactive machine learning for (bio)image analysis. *Nat Methods*  
735 **16**, 1226-1232 (2019).
- 736 55. Gruenberg, J., Allred, D. R. & Sherman, I. W. Scanning electron microscope-analysis of  
737 the protrusions (knobs) present on the surface of *Plasmodium falciparum*-infected  
738 erythrocytes. *J Cell Biol* **97**, 795-802 (1983).
- 739 56. Tokuyasu, K. T. A technique for ultracryotomy of cell suspensions and tissues. *J Cell Biol*  
740 **57**, 551-565 (1973).
- 741 57. Schindelin, J. et al. Fiji: an open-source platform for biological-image analysis. *Nat*  
742 *Methods* **9**, 676-682 (2012).
- 743

744 **Figure legends**

745

746 **Figure 1.** A) Strategy for inactivation of *PFA0660w* via selection-linked integration. Expression  
747 of a neomycin resistance marker (NEO) is coupled to integration of the plasmid pSLI<sup>TGD\_PFA</sup>  
748 into the genomic *PFA0660w* locus, leading to expression of a truncated (likely inactive) PFA66  
749 missing its substrate binding domain (SBD). Production of PFA and NEO as separate proteins  
750 is ensured with a SKIP peptide. B) Integration PCR using gDNA extracts from the cell line  
751  $\Delta PFA$  and the parental cell line CS2 verifies integration of the plasmid pSLI<sup>TGD\_PFA</sup> into the  
752 *PFA0660w* gene in the cell line  $\Delta PFA$ . Amplification of the wild type *PFA0660w* locus with the  
753 primers PFA0660w\_5'\_F and PFA0660w\_5'\_R is only successful in the parental strain CS2  
754 since integration of the plasmid dramatically increases product size. PCRs using primers  
755 spanning the junctions of the integration sites (PFA0660w\_5'\_F and GFP\_R for the 5' region  
756 and Not-70\_F and PFA0660w\_5'\_R for the 3' region) demonstrate disruption of *PFA0660w*.  
757 The 3' integration band is marked with an asterisk. Additional controls can be found in Figure  
758 S1. C) Western blot verifies truncation of *PFA0660w* in  $\Delta PFA$ . The truncated fusion protein  
759 was detected using an  $\alpha$ -GFP antibody, while the parasite protein SERP served as a loading  
760 control. D) Detection of a band representing HA-tagged, episomally expressed PFA66 in a  
761 western blot verifies the complementation cell line  $\Delta PFA^{[PFA::HA]}$ .

762

763 **Figure 2.** Electron microscopy reveals deformed knob morphologies of  $\Delta PFA$  iRBCs. A)  
764 Scanning electron microscopy shows knobs on the surface of iRBCs. The mutant phenotype  
765 of  $\Delta PFA$  is alleviated upon reintroduction of episomally expressed PFA66 in  $\Delta PFA^{[PFA::HA]}$ . More  
766 pictures can be found in Figure S2. B). Quantification of knob density via ImageJ in SEM  
767 pictures (n = 20) shows significantly fewer knobs on  $\Delta PFA$  iRBCs. Knob density is restored in  
768 the complementation cell line CS2 $\Delta PFA^{[PFA::HA]}$ . C) Quantification of knob morphology across  
769 all iRBCs. Knobs were grouped into three categories: small knobs, enlarged knobs, and  
770 elongated knobs. Then every knob on 20 SEM pictures of the three strains was assigned to  
771 one of these categories. Each bar represents the distribution of these knobs in the three  
772 categories across all pictures of a strain. The  $\Delta PFA$  strains display an increase in deformed  
773 and enlarged knob morphologies compared to CS2 and  $\Delta PFA^{[PFA::HA]}$ . D) Internal view of the  
774 deformed knobs/mentula via transmission electron microscopy of thin slices. More pictures  
775 can be found in Figure S3, E. Electron tomography reveals electron-dense material at the base  
776 and interior of deformed knobs/mentulae. The marked area denotes the structure shown in F.  
777 F) 3D segmentation of discrete densities within a deformed knob/mentula depicted with  
778 electron tomography. The example shows a severely deformed knob/mentula. Additionally  
779 electron dense material was detected at the base and inside of these structures.

780

781 **Figure 3.** A) Immunofluorescence assay of MeOH-Ac-fixed CS2 and  $\Delta PFA$  using  $\alpha$ -KAHRP  
782 antibodies reveals punctate patterns. A trend was noticed towards bigger spots in the  
783 truncation strain and verified using automated measuring via an ImageJ algorithm (See Figure  
784 3 B, C). D) Live cell imaging of DAPI stained CS2<sup>[KAHRP::mCherry]</sup> and  $\Delta PFA$ <sup>[KAHRP::mCherry]</sup>.  
785 KAHRP::mCherry can be seen in both cell lines as punctate patterns; however, CS2 displays  
786 smaller and more dots. E) Immunogold labelling of iRBC sections in TEM using  $\alpha$ -KAHRP  
787 antibodies. Images demonstrate label associated with normal knobs and deformed knobs in  
788 CS2 and  $\Delta PFA$ , respectively. Framed areas can be seen enlarged below. F) Analysis of label  
789 density associated with the cytoplasm and area surrounding knobs. Label density is  
790 significantly higher in the area surrounding knobs than the cytoplasm for both strains. G) STED  
791 imaging of the KAHRP associated with the internal RBC cytoskeleton. For this analysis CS2  
792 and  $\Delta PFA$  iRBCs were bound to a dish and then lysed hypotonically. The cell body was then  
793 washed away, and the remaining cytoskeleton remained as it would be seen from the inside  
794 of the iRBC. These samples were then interrogated with an  $\alpha$ -KAHRP antibody and STED  
795 imaging. G) Representative images of the KAHRP patterns observed in STED from the CS2  
796 and  $\Delta PFA$  cell line. KAHRP signals were often found to be bigger in the truncation cell line. H)  
797 Computational analysis of KAHRP signals through a self-made ImageJ tool revealed no  
798 difference in KAHRP spot numbers between both cell lines. I) Investigation of mean object size  
799 demonstrated a slight increase of KAHRP spot size in  $\Delta PFA$ .

800  
801 **Figure 4.** Investigation of the subcellular composition of deformed knobs in  $\Delta PFA$ <sup>[KAHRP::mCherry]</sup>  
802 via rSTED imaging in an immunofluorescence assay. A, C) DNA was stained using DAPI;  
803 WGA was used to stain the RBC glycocalyx; phalloidin was used to stain actin; and RFP  
804 booster was used to label KAHRP::mCherry. B, D) RGB profiles of selected,  
805 KAHRP\_mCherry-rich structures (likely representing knobs). The RGB profiles demonstrate  
806 that in the vertical view, phalloidin (*i.e.* actin) is localized toward the cytosol from the KAHRP  
807 structures. The horizontal view shows that the KAHRP-containing structures form a ring  
808 structure. These might contain low amounts of actin but are likely filled with other material(s).

809  
810 **Figure 5.** A)  $\Delta PFA$  displays negligible cytoadherence and lower PfEMP1 surface exposure  
811 than CS2. CS2 and  $\Delta PFA$  were assayed to test their ability to adhere to immobilized CSA in  
812 Petri dishes using microscopic counting of the cells. Cytoadhesion strength is expressed  
813 relative to CS2. Results are shown for six binding assays. B) Analysis of PfEMP1 surface  
814 exposure via flow cytometry. IRBCs were stained with DAPI and  $\alpha$ VAR2CSA antiserum  
815 followed by a Cy3-coupled secondary antibody.  $\Delta PFA$ s have lower PfEMP1 surface exposure  
816 than CS2 in six independent experiments. C) Expression of a PFA variant featuring a mutated  
817 HPD motif in the cell line  $\Delta PFA$ <sup>[QPD::HA]</sup> does not complement reduction in knob abundance (C)

818 and knob deformation (D) observed in  $\Delta PFA$ . As in previous experiments, iRBCs of the three  
819 cell lines were purified and imaged via SEM. Knobs were then counted and grouped into three  
820 categories.

821

822 **Figure 6.** Proposed model for *mentula* bioformation. In opposition to normal knob formation in  
823 the CS2 cell line (left) runaway extension of the spiral underlying *mentulae* in  $\Delta PFA$  could drive  
824 their elongation (right). KAHRP is still present and associated with the inner lumen of *mentulae*,  
825 PfEMP1 anchored in the *mentulae* is incorrectly presented and has thus a reduced  
826 cytoadherence capacity.

827

828 **Figure S1.** A) An equinatoxin lysis experiment demonstrates export of truncated PFA::GFP.  
829 Equinatoxin (EQT) treatment selectively lyses the RBC membrane but leaves the PVM and  
830 PPM intact. Consequentially, parasite proteins exported to the host cell are found in the  
831 supernatant, while other parasite proteins remain in the pellet. Detection of the PV protein  
832 SERP and the parasite protein ALDO in the pellet fraction demonstrates intactness of the PV  
833 membrane and PPM, respectively. Truncated PFA::GFP was detected alongside human  
834 HSP70 and the exported parasite protein GBP in the supernatant fraction, demonstrating its  
835 export to the iRBC. B)  $\Delta PFA$  display a slight decrease in NPP activity when compared to CS2.  
836 iRBCs were incubated with the hypotonic agent sorbitol, and NPP activity was assessed by  
837 measuring the OD of the supernatant. Results are shown for ten replicates. C) Growth of CS2  
838 and  $\Delta PFA$  was measured over four cycles via flow cytometry of DAPI-stained, fixed parasites.  
839  $\Delta PFA$  show a slight growth advantage over CS2 in the last cycle. Results are shown for three  
840 independent experiments.

841

842 **Figure S2.** SEM image of a non-infected erythrocyte and additional SEM images of CS2,  $\Delta PFA$   
843 and  $\Delta PFA^{[PFA::HA]}$ .

844

845 **Figure S3.** Additional TEM images of CS2 and  $\Delta PFA$ .

846

847 **Figure S4.** Investigation of marker protein localization using specific antisera in MeOH  
848 acetone-fixed  $\Delta PFA$  with an immunofluorescence assay. No drastic difference in the  
849 localization of EXP2, HSP70x, SBP1, REX2, PFEMP3, or PHIST C was found.

850

851 **Figure S5.** A) Investigation of label distribution in the  $\alpha$ -KAHRP immuno-TEM. Distance of  
852 label from the base of the knob was measured using ImageJ and expressed relative to the  
853 length of the entire knob in percentages (0% being the base and 100% the top). The distribution  
854 of label along the full length of the knobs did not differ between the strains and knob types, B)

855 Distance of label to the closest membrane was measured using ImageJ, revealing no  
856 difference between the strains and knob types. C) Verification of CS2<sup>[KAHRP::mCherry]</sup> and  
857  $\Delta PFA$ <sup>[KAHRP::mCherry]</sup> via Western blot verifies the production of KAHRP::mCherry protein in the  
858 cell lines using an  $\alpha$ -mCherry antibody. The parasite protein aldolase (ALDO) was used as a  
859 loading control. D) RSTED images of CS2<sup>[KAHRP::mCherry]</sup> reveal close association of  
860 KAHRP::mCherry with the cytoskeleton and glycocalyx. Larger aggregates of  
861 KAHRP::mCherry were, in contrast to  $\Delta PFA$ <sup>[KAHRP::mCherry]</sup>, not observed.

862

863 **Figure S6.** A) Treatment with the actin depolymerizing agent cytochalasin-D does not resolve  
864 knob density (A) and *mentula* knob morphology (B) N = 15. C, D) Investigation of treatment  
865 with the lipid raft disruptor MBCD (C, D) the glucosidases hyaluronidase (HA) and  
866 neuraminidase (NA) (E) on knob-type distribution in the two cell lines. N = 15. F)  
867 Concatenation of all iRBC data from the experiments in Figure 5B also shows a decrease of  
868 Cy3-caused fluorescence in  $\Delta PFA$  across all experiments. Total number of single cells:  
869 1,798,268 (CS2) and 1,799,274 ( $\Delta PFA$ ). G) Investigation whether MeOH-fixed parasites with  
870 an  $\alpha$ -VAR2CSA antibody demonstrate that both CS2 and  $\Delta PFA$  express var2CSA to similar  
871 levels. H) Western blot showing expression of QPD::HA in  $\Delta PFA$ <sup>[QPD::HA]</sup> with an  $\alpha$ -HA antibody.  
872 The parasite protein SERP was used as a loading control.

873

874 **Supplementary Video 1.** 3D reconstruction and surface render of *mentulae* depicted in  
875 Figures 2E, F. Red, erythrocyte plasma membrane; blue, electron dense material.

876

877 **Supplementary Video 2A.** Z-stack of erythrocytes infected with CS2<sup>[KAHRP::mCherry]</sup> in mCherry  
878 channel.

879

880 **Supplementary Video 2B.** Z-stack of erythrocytes infected with CS2<sup>[KAHRP::mCherry]</sup> in mCherry  
881 channel.

882

883 **Supplementary Video 2C.** Z-stack of erythrocytes infected with  $\Delta PFA$ <sup>[KAHRP::mCherry]</sup> in mCherry  
884 channel.

885

886 **Supplementary Video 2D.** Z-stack of erythrocytes infected with  $\Delta PFA$ <sup>[KAHRP::mCherry]</sup> in mCherry  
887 channel.



**A**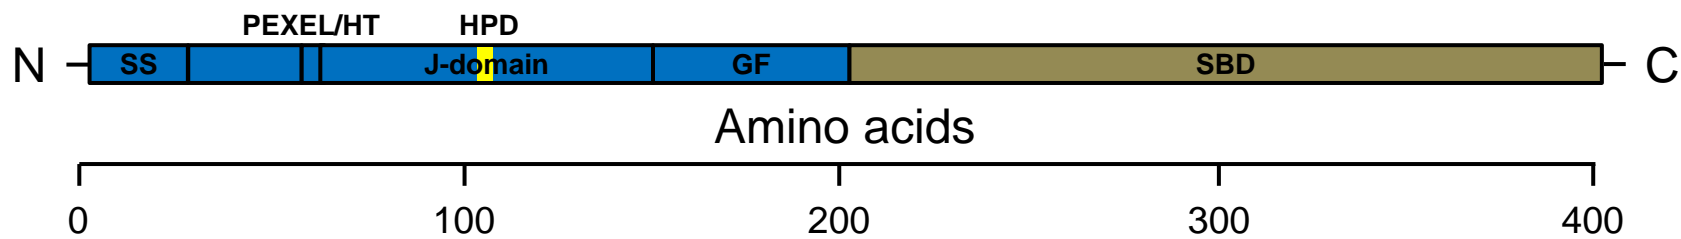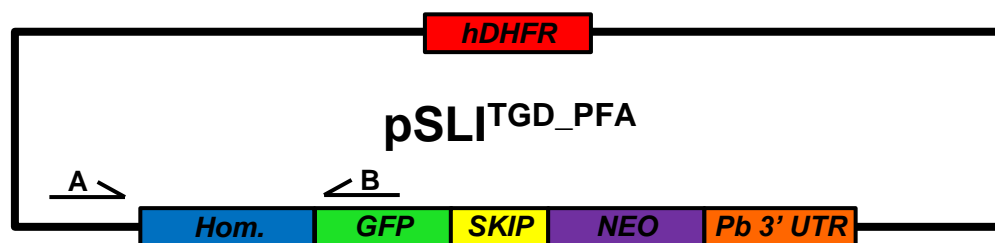**X**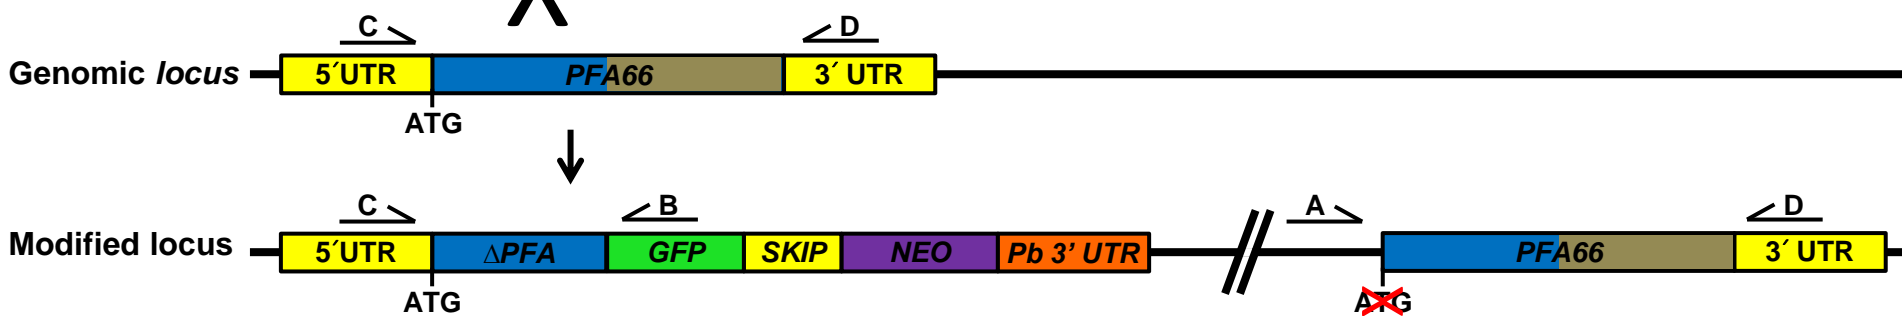**B**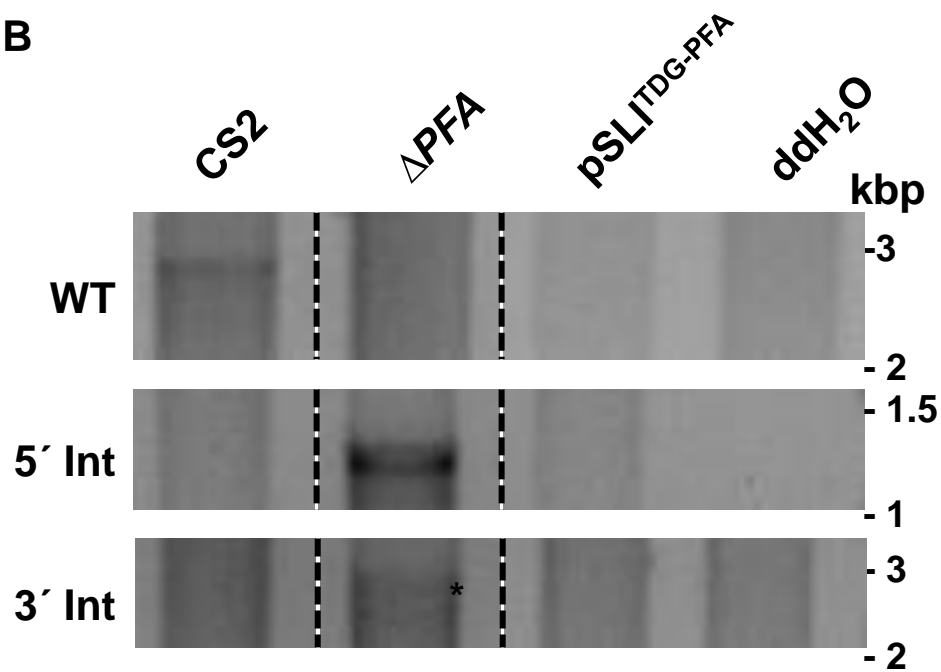**C**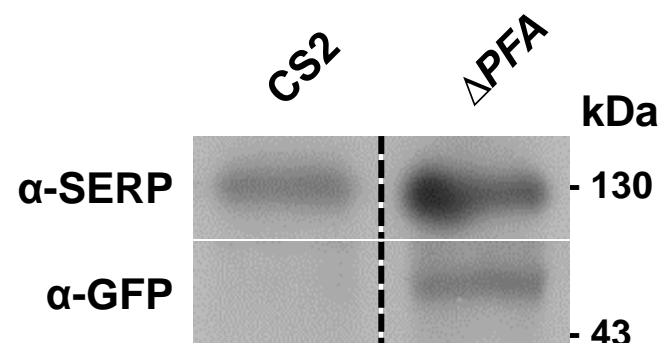**D**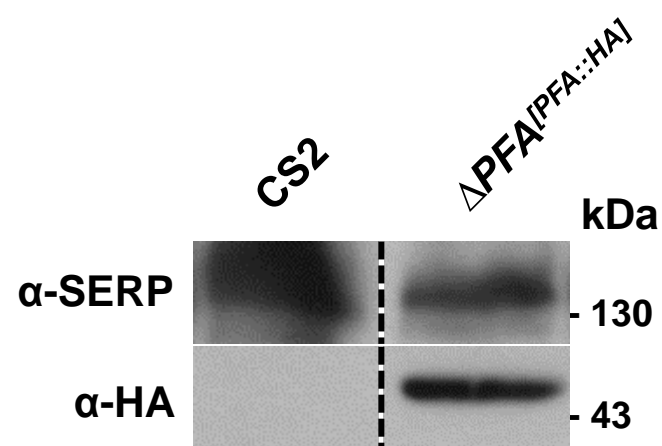

A

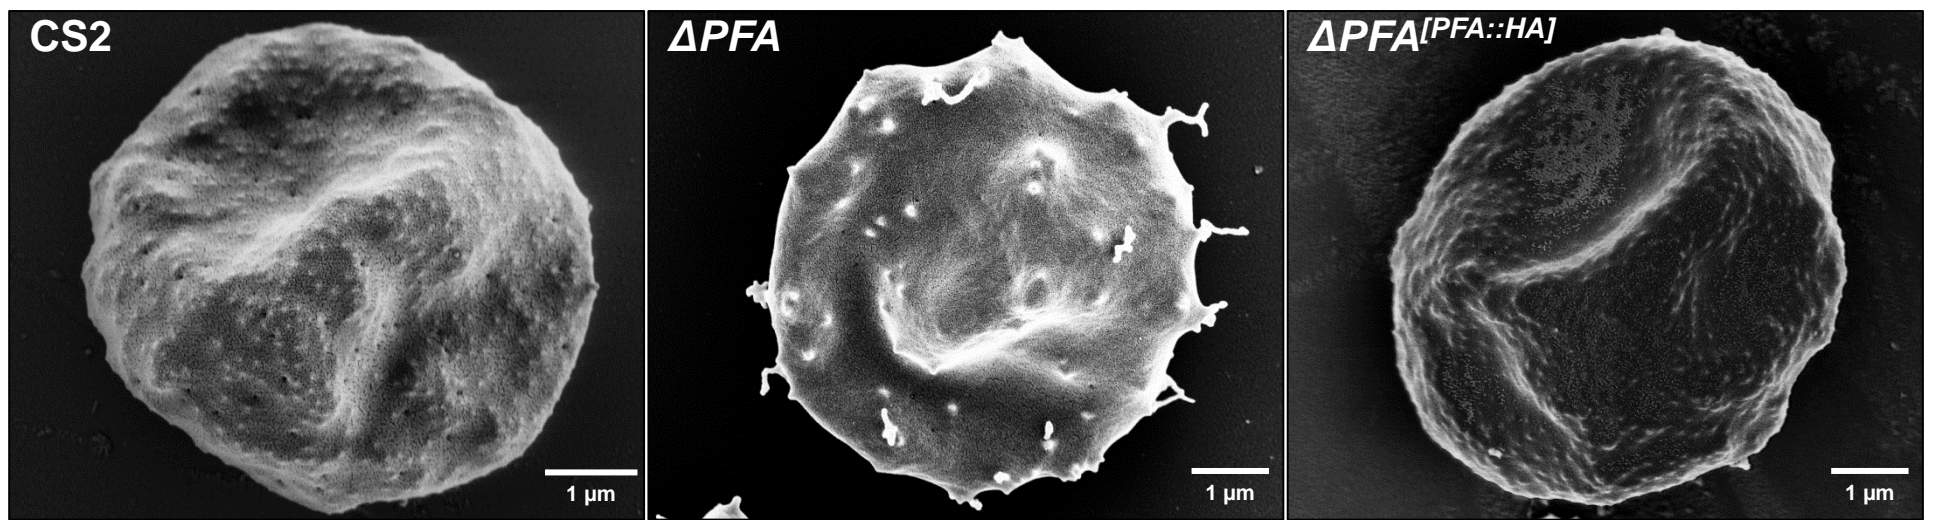

B

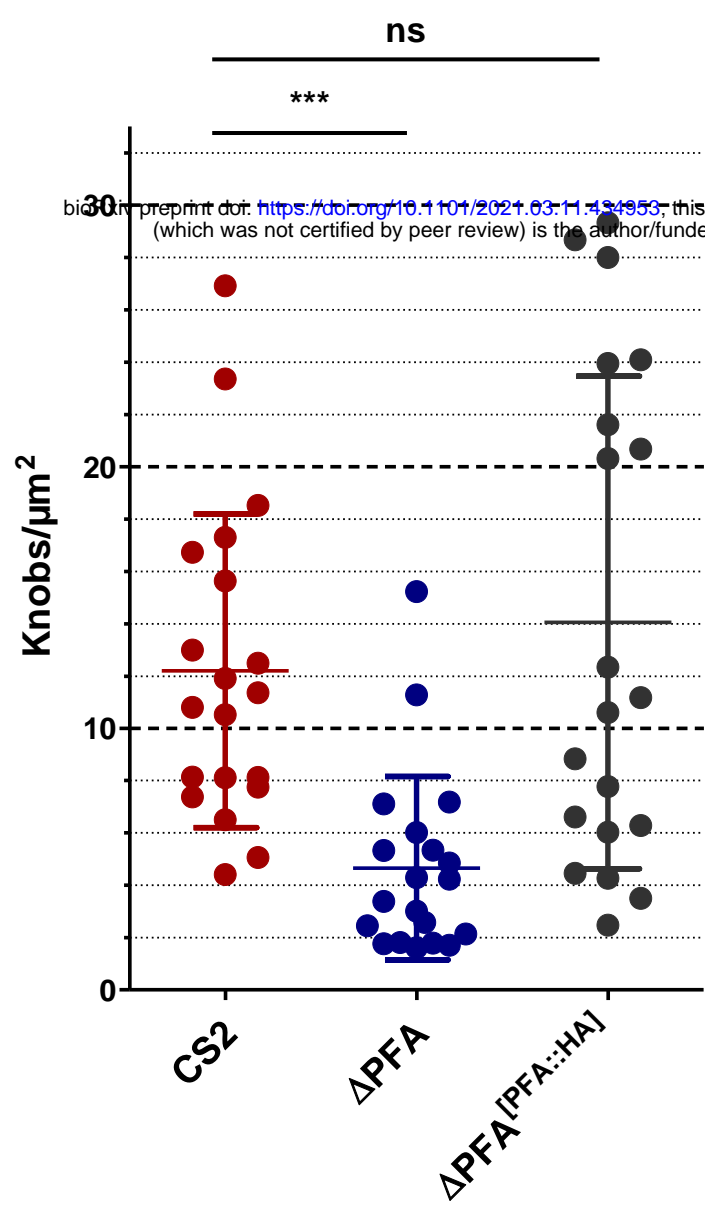

C

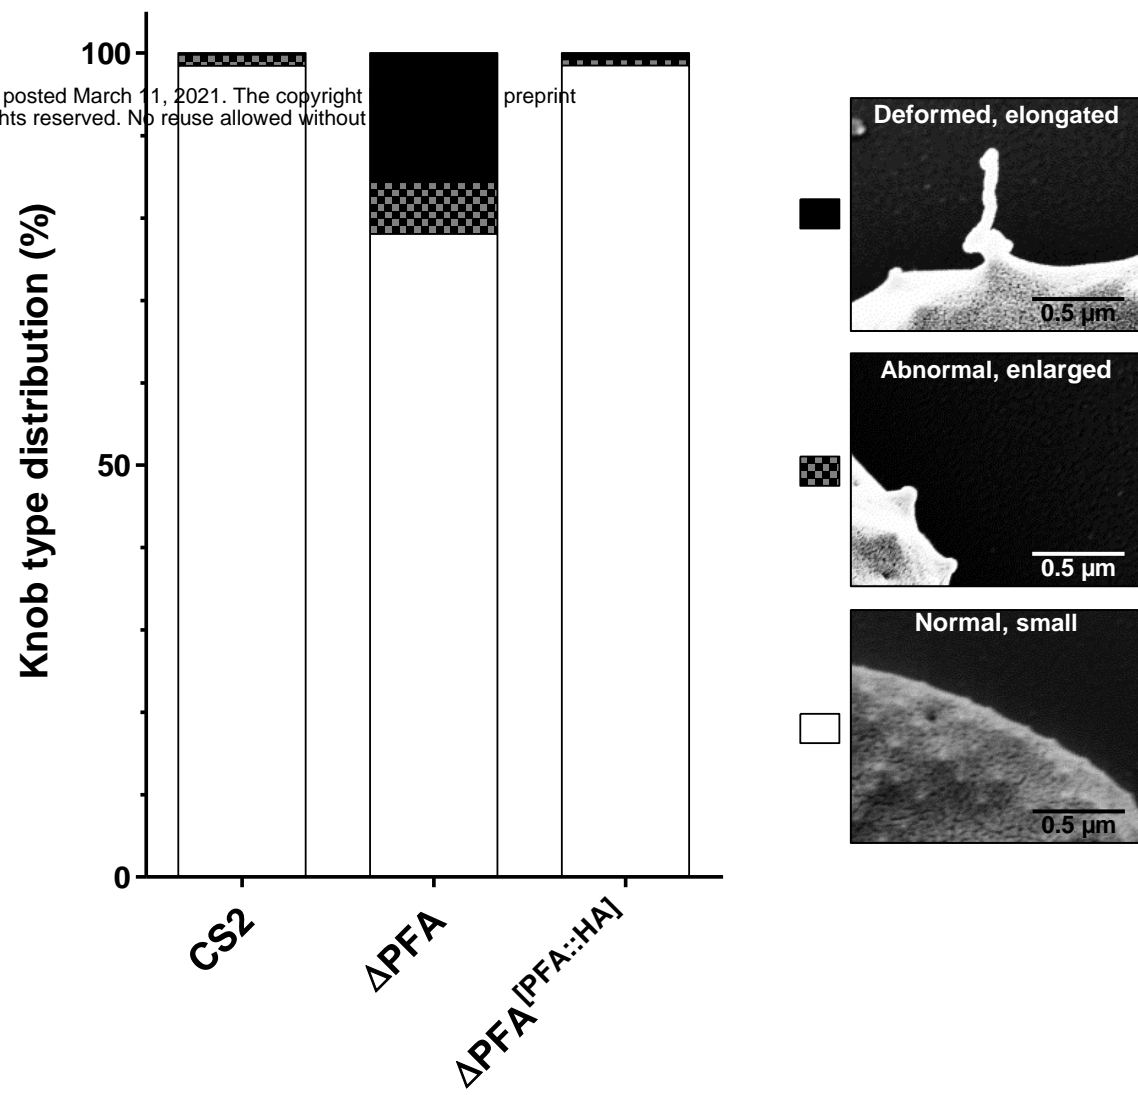

D

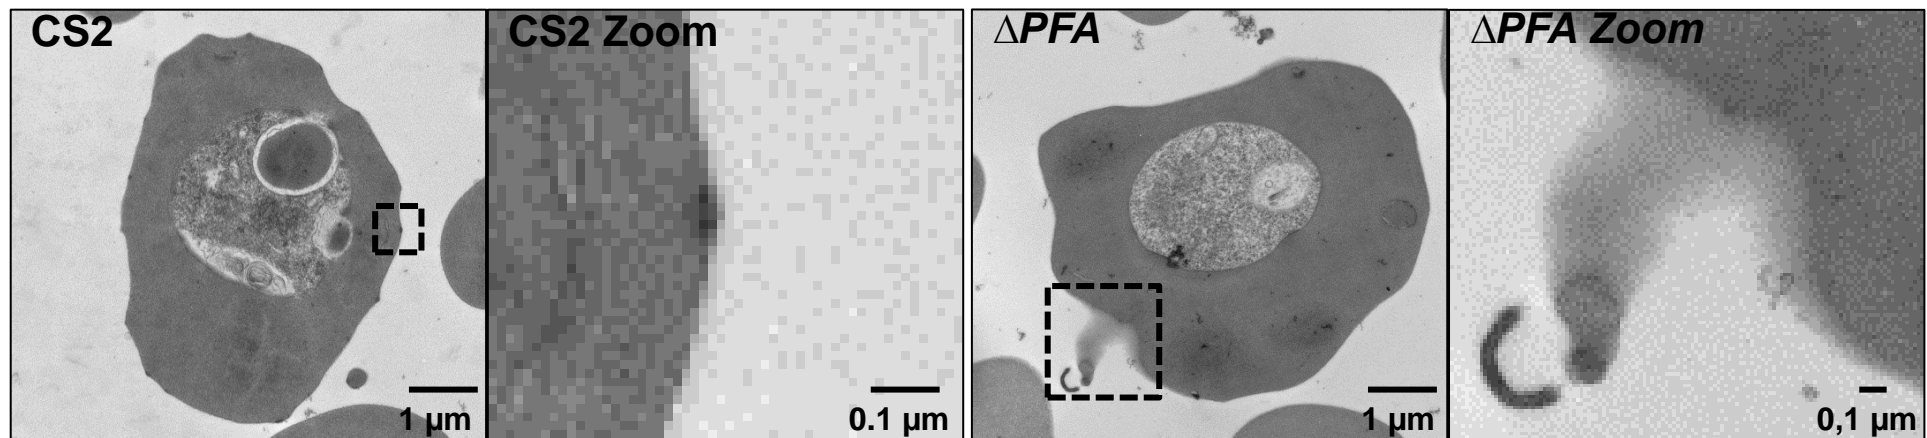

E

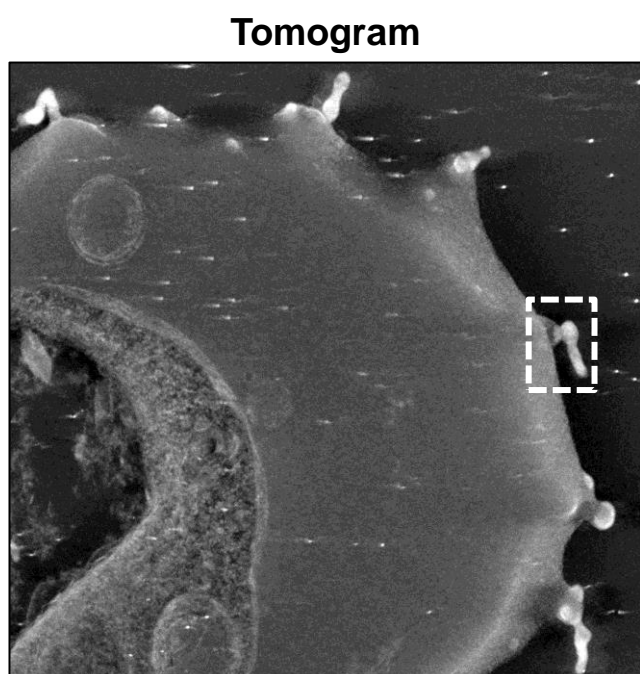

F

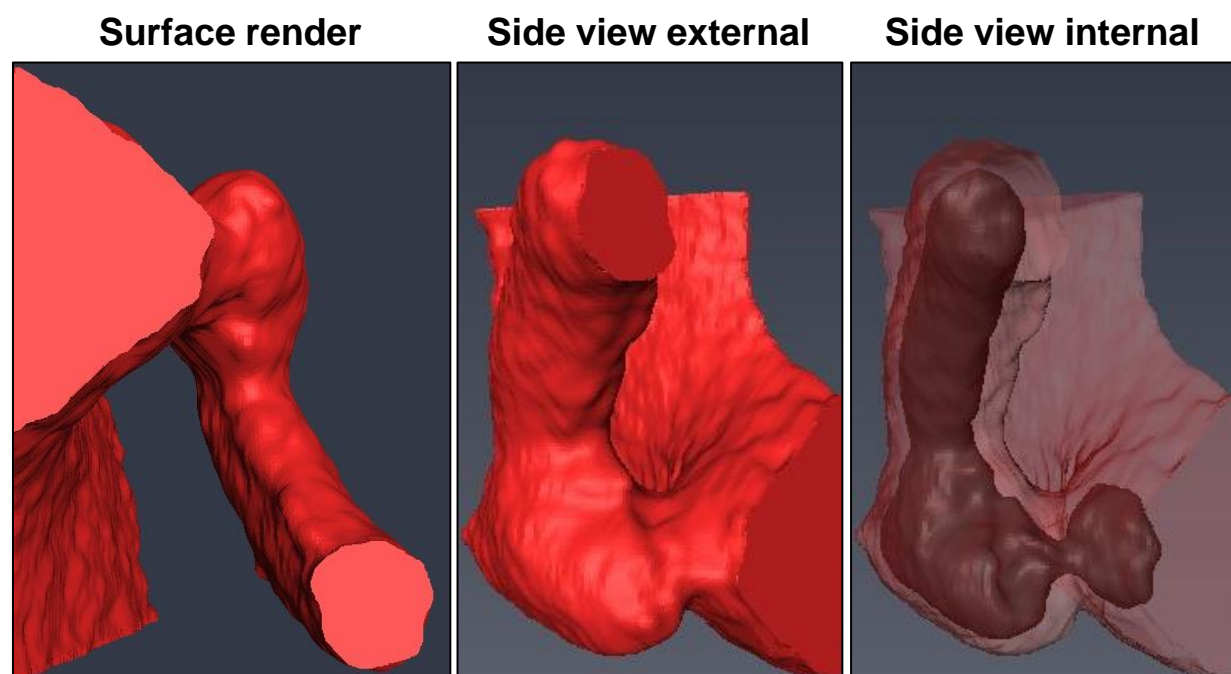

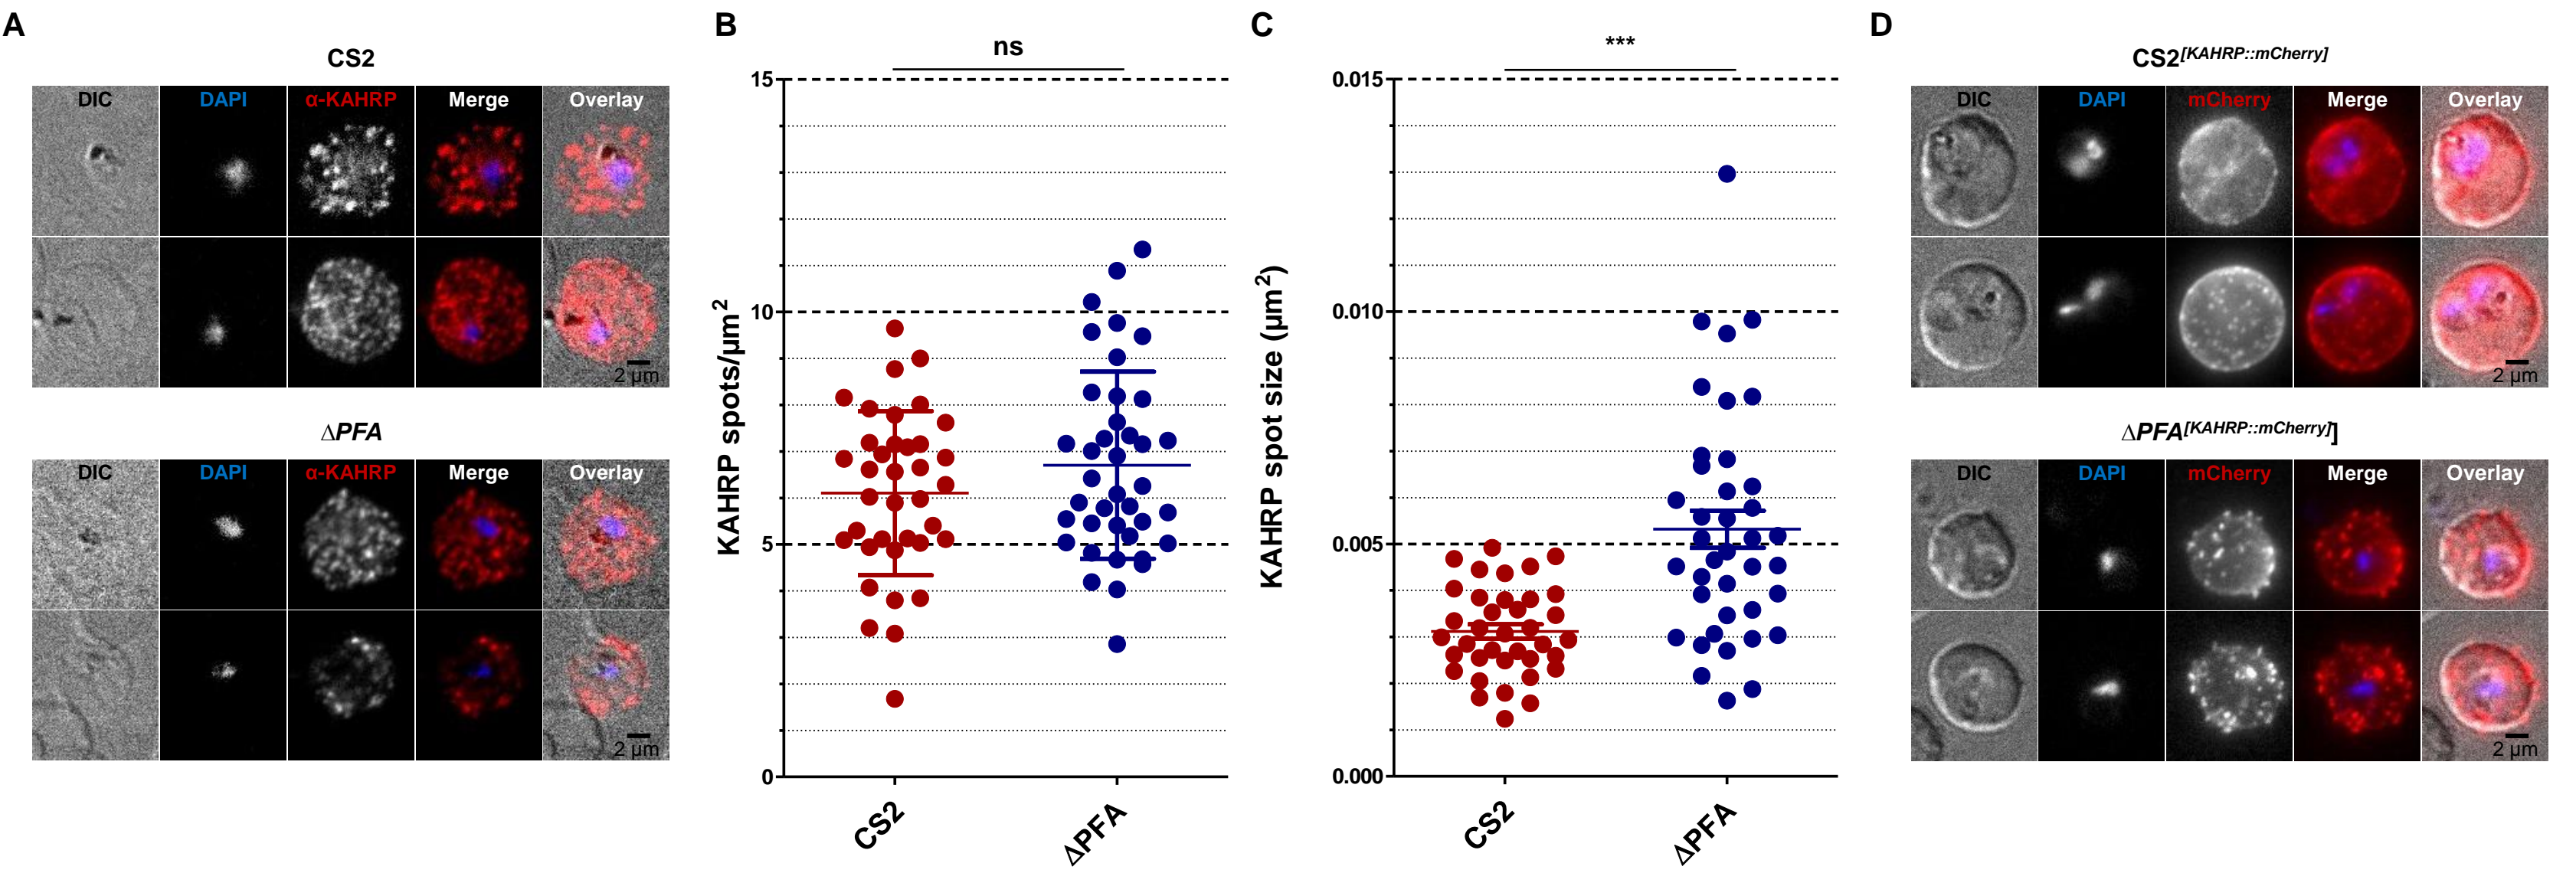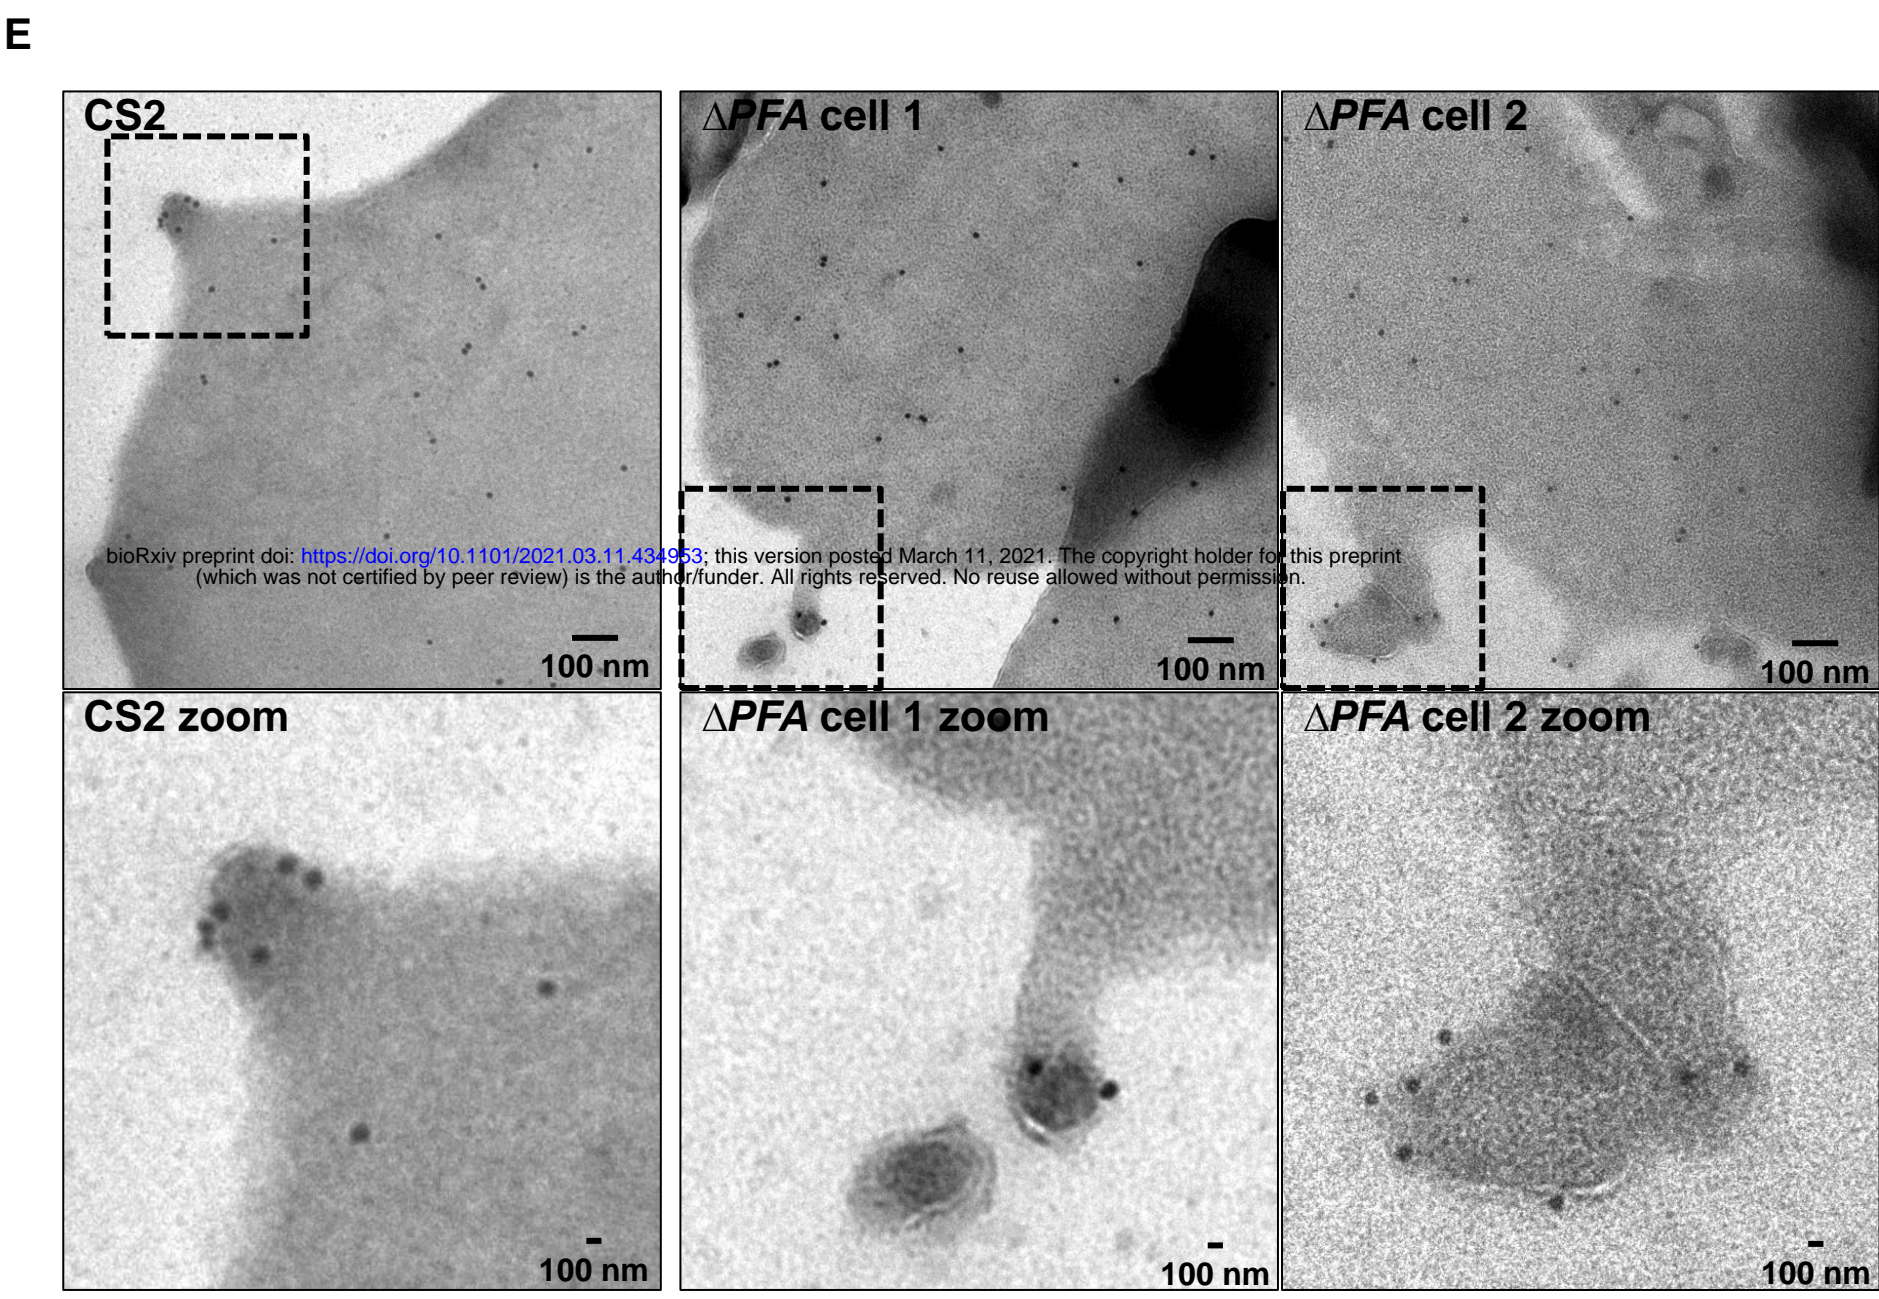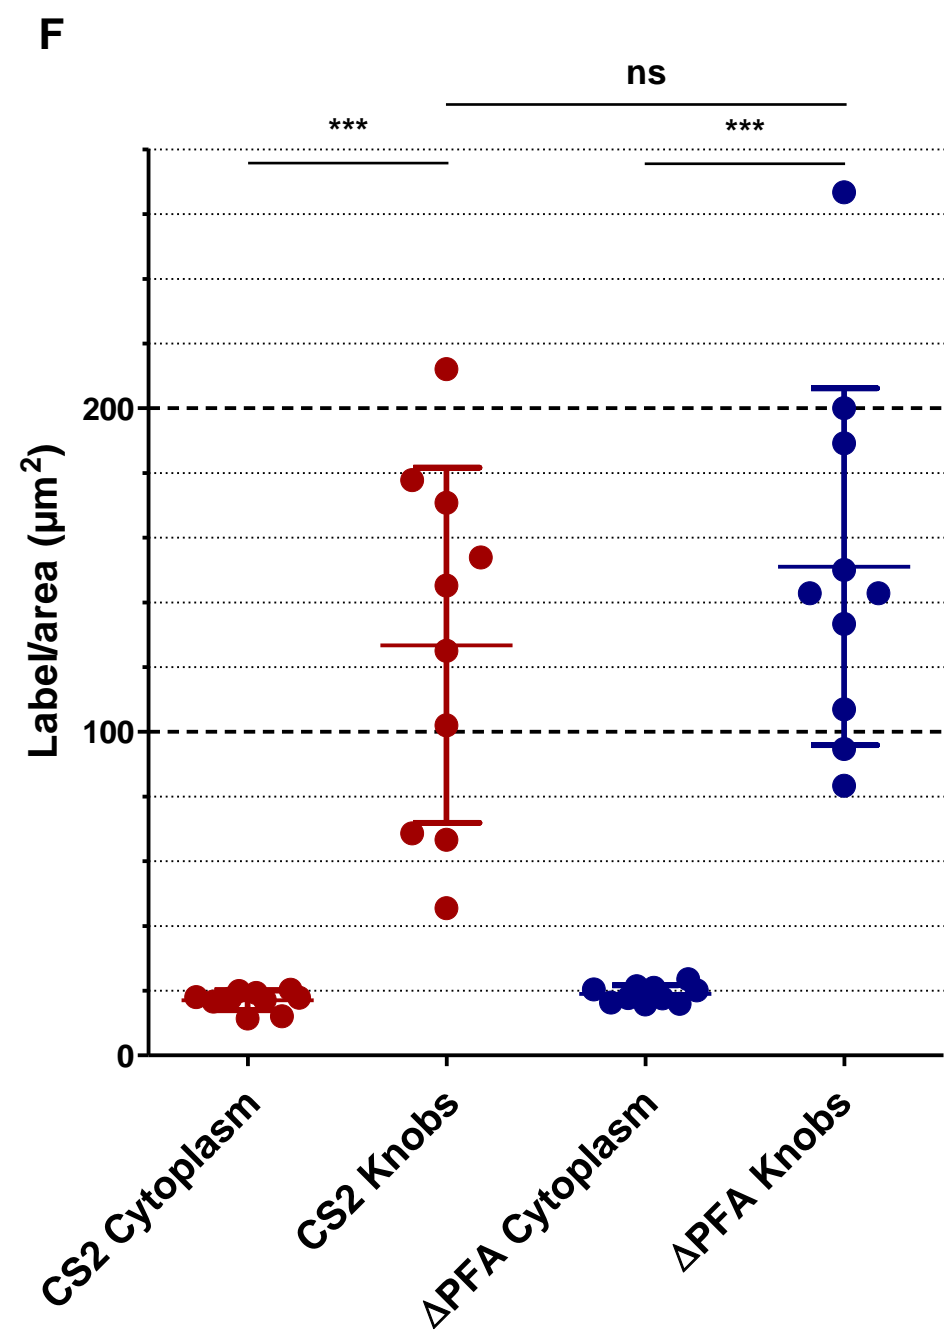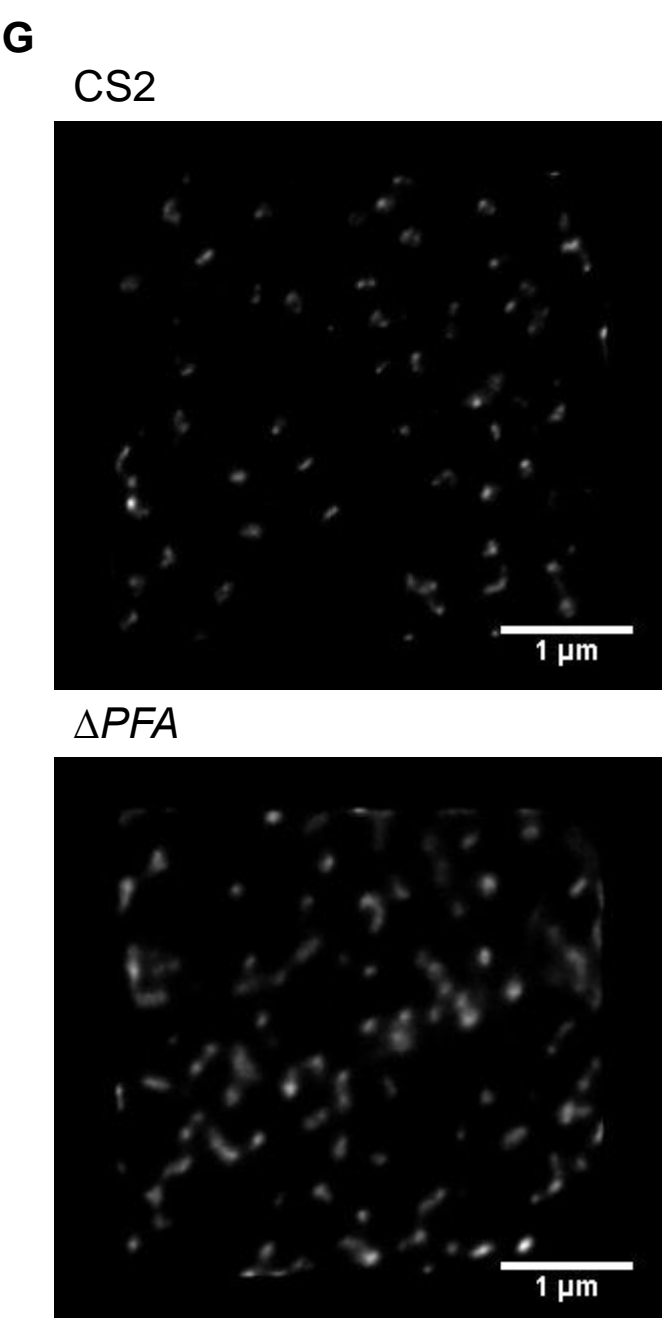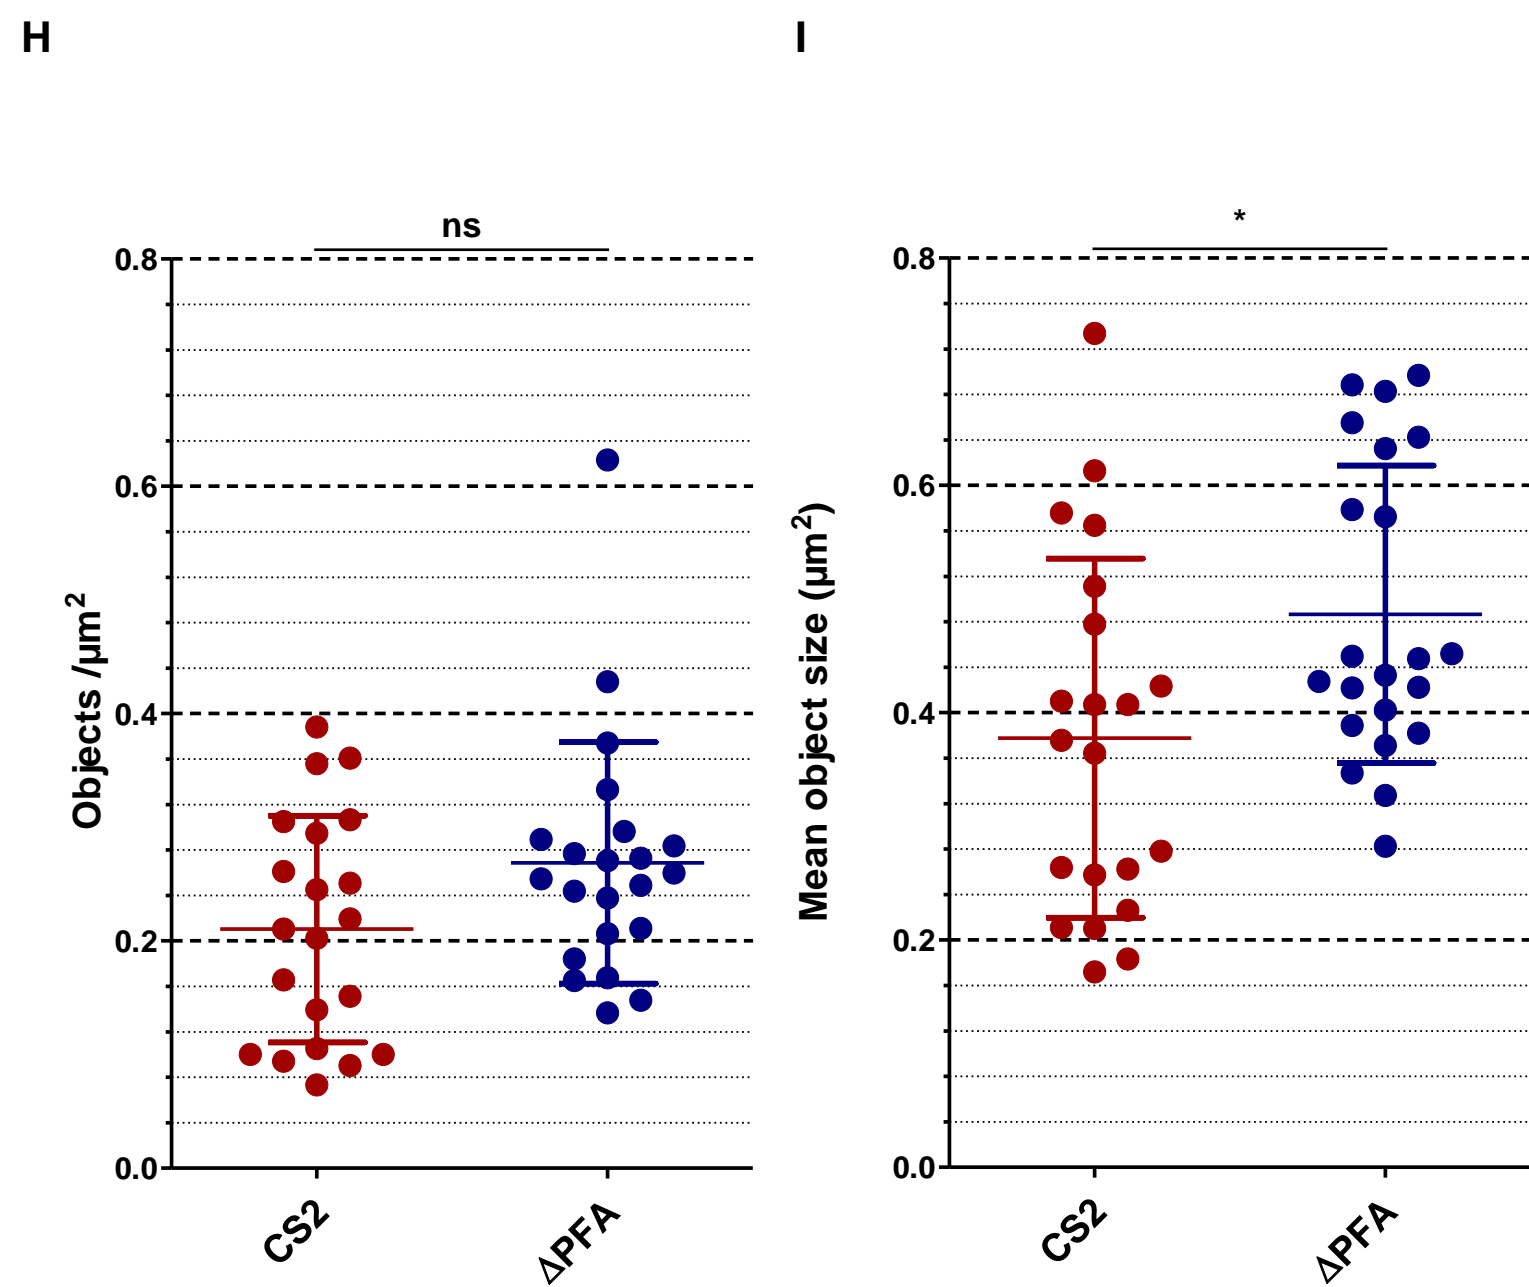

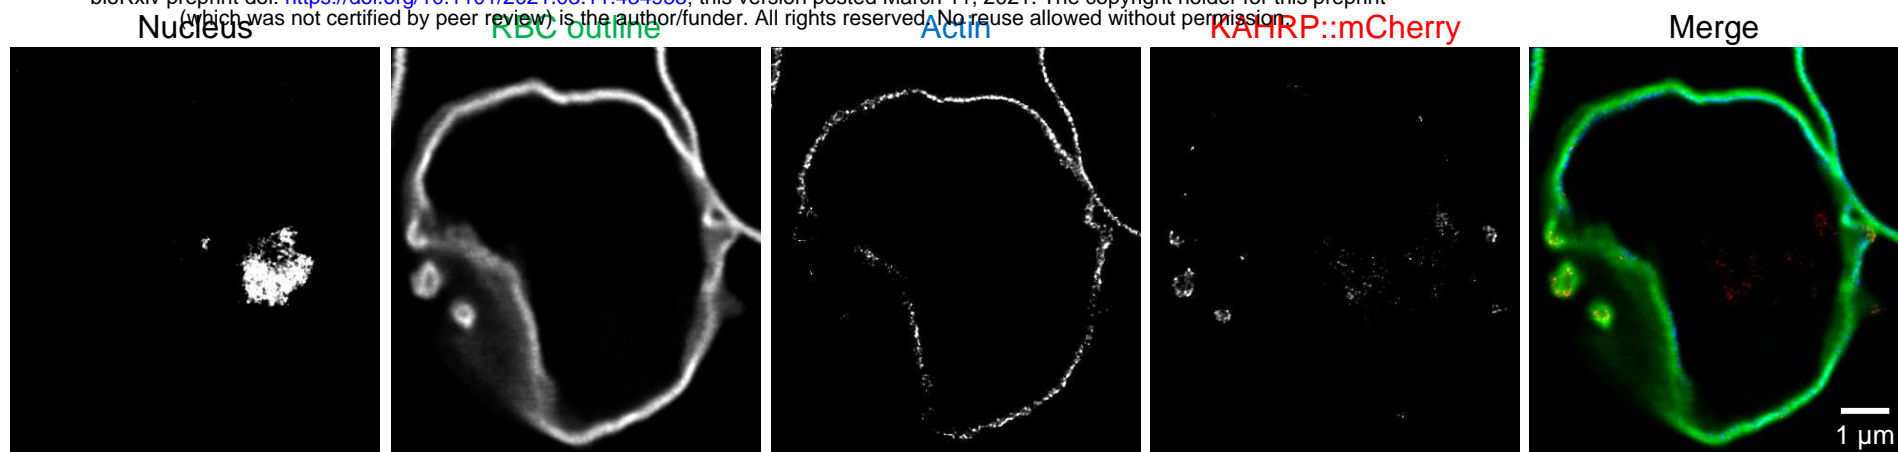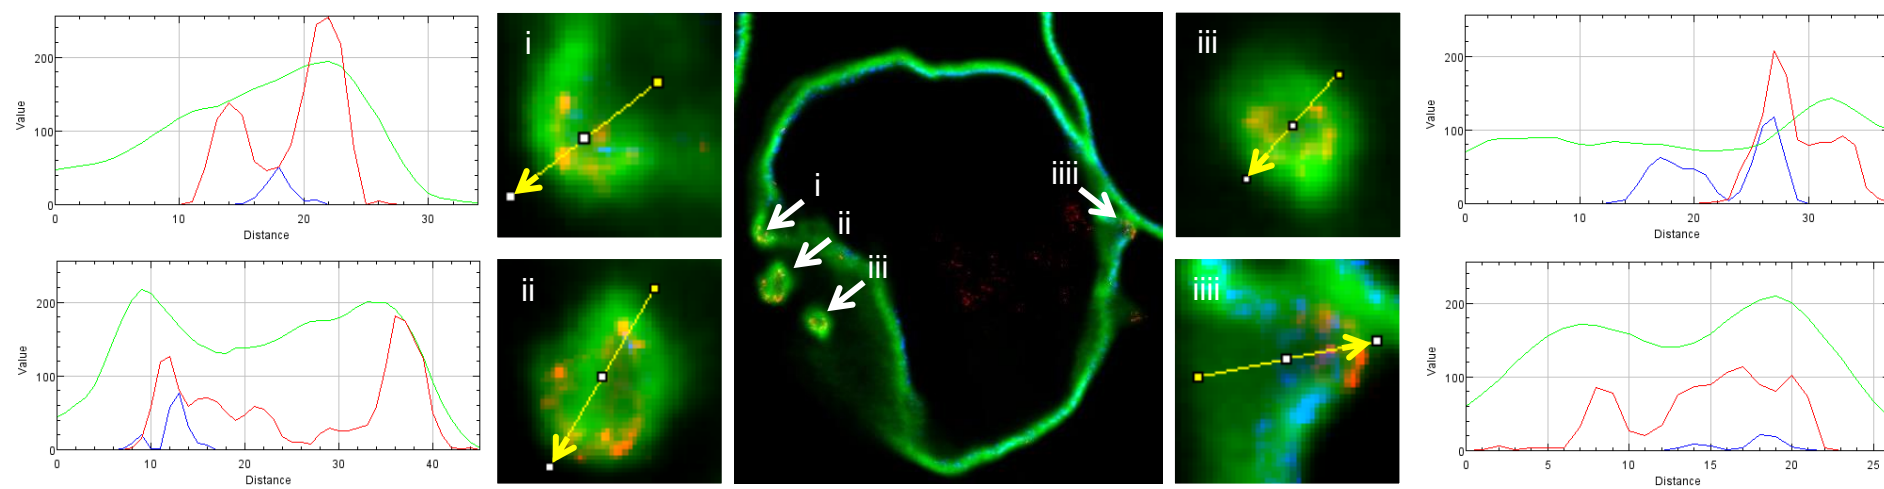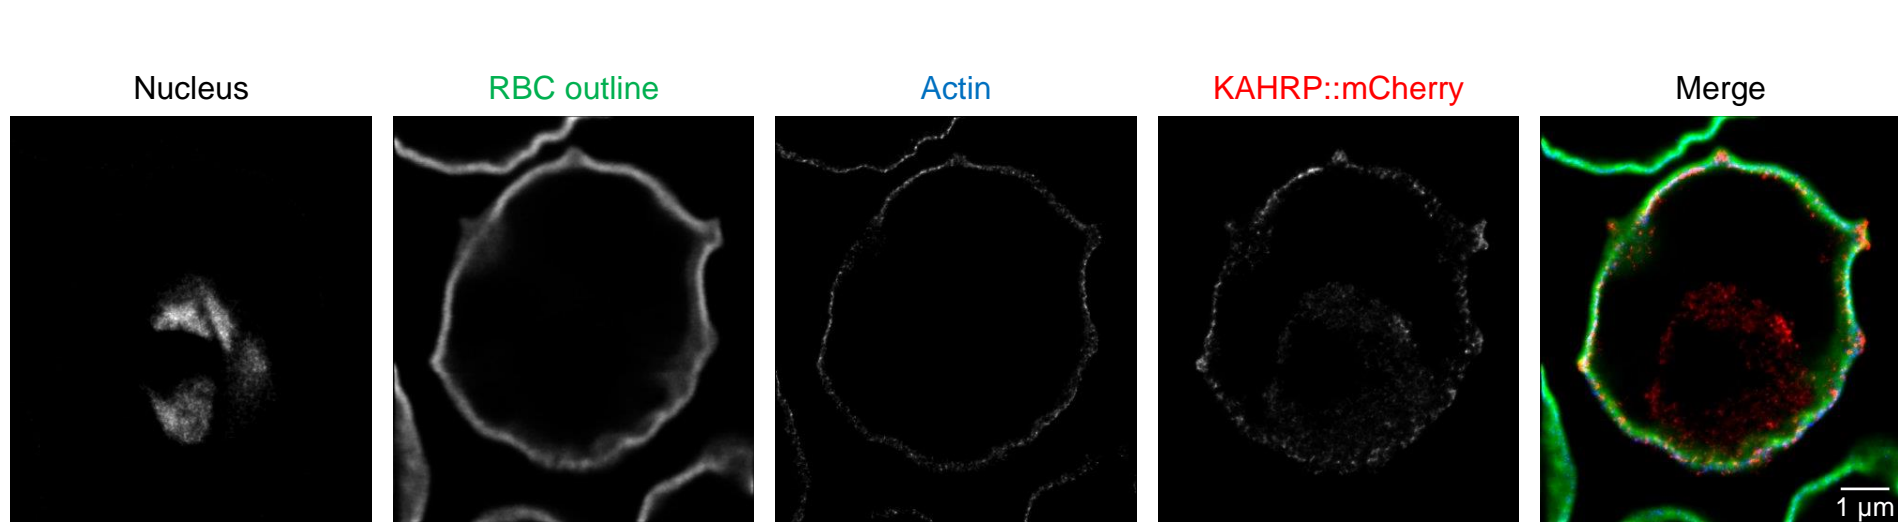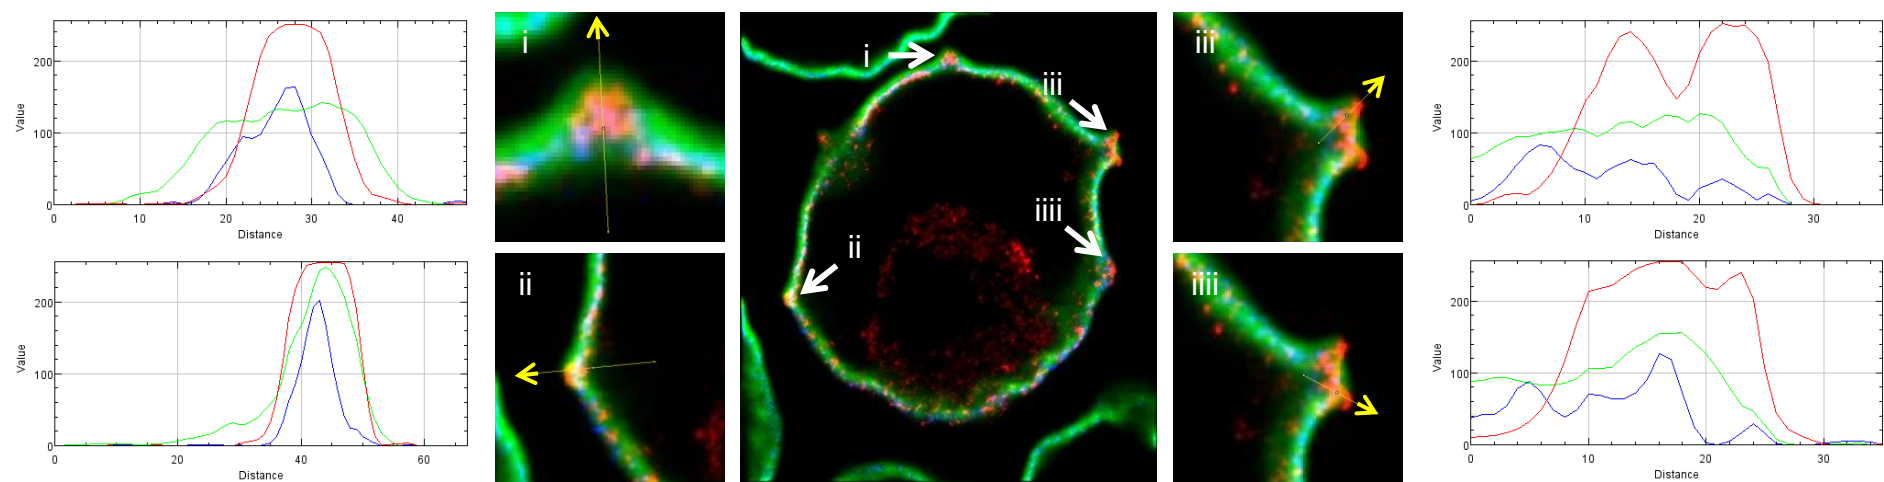

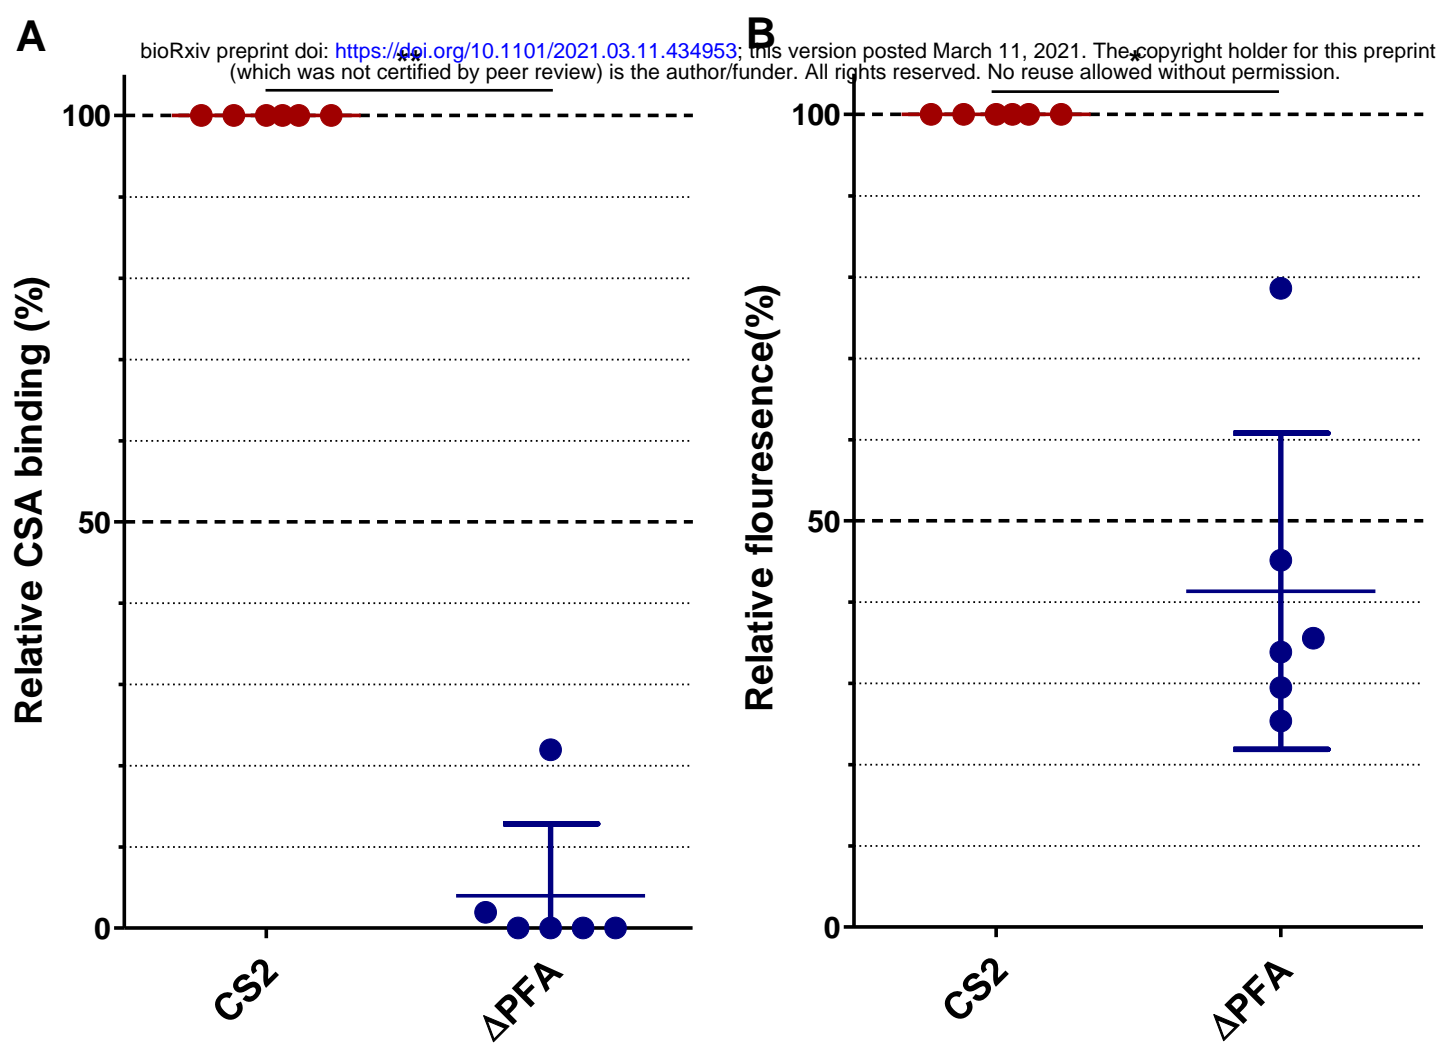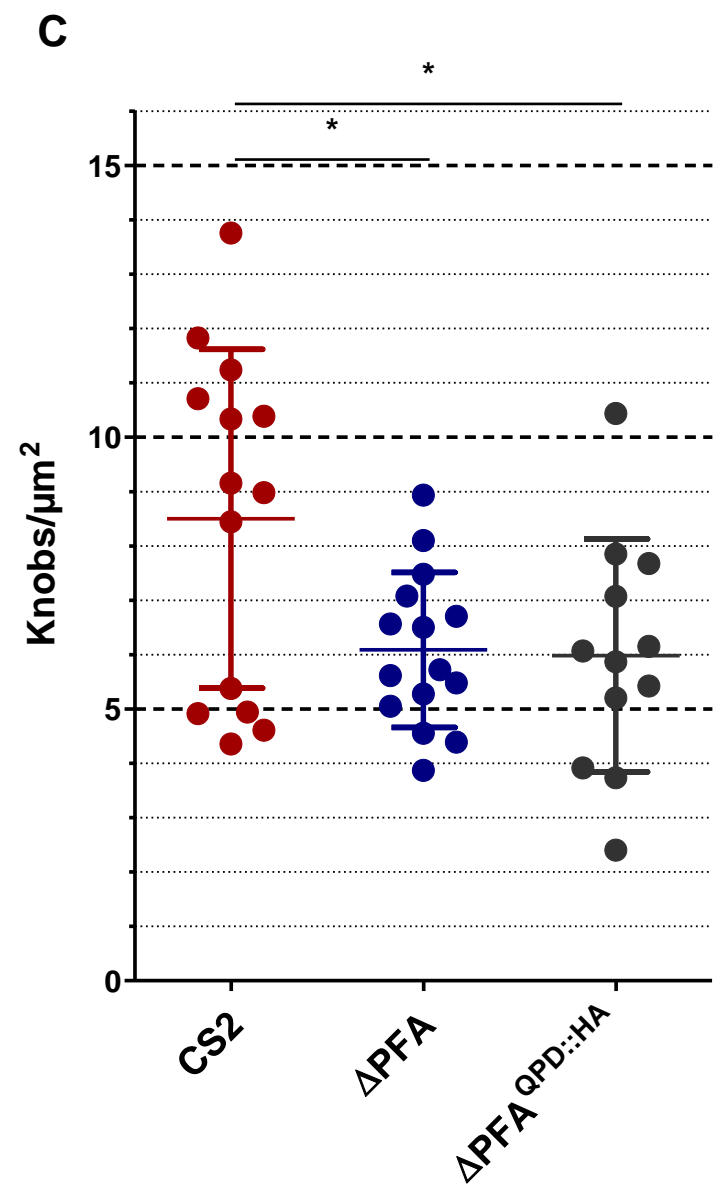

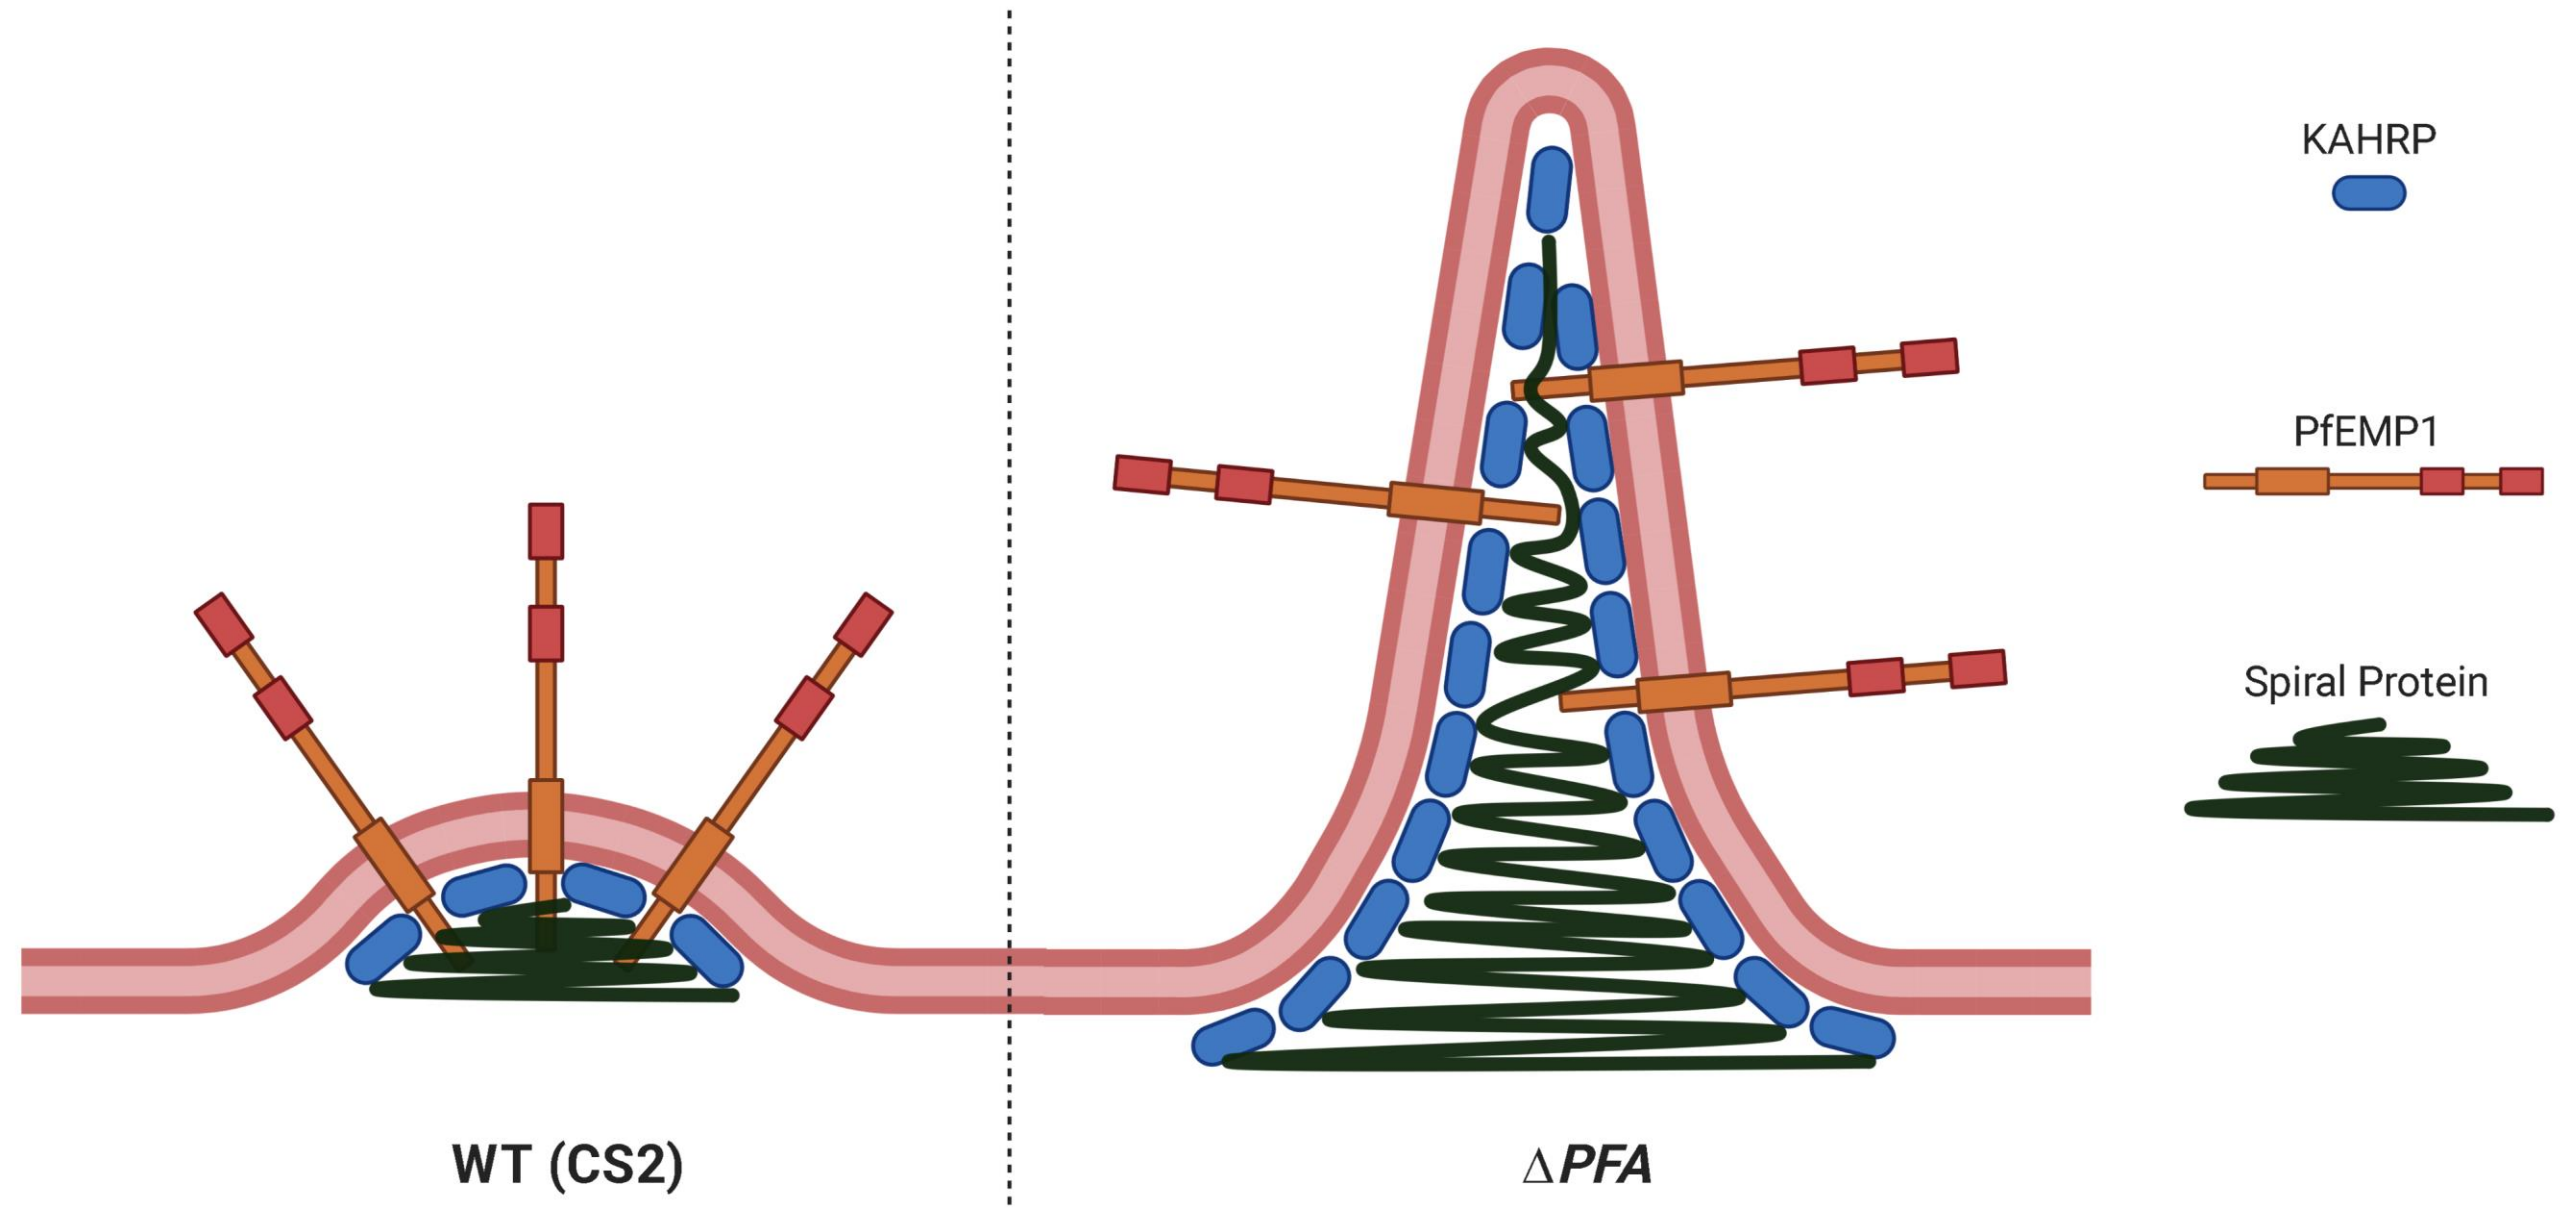

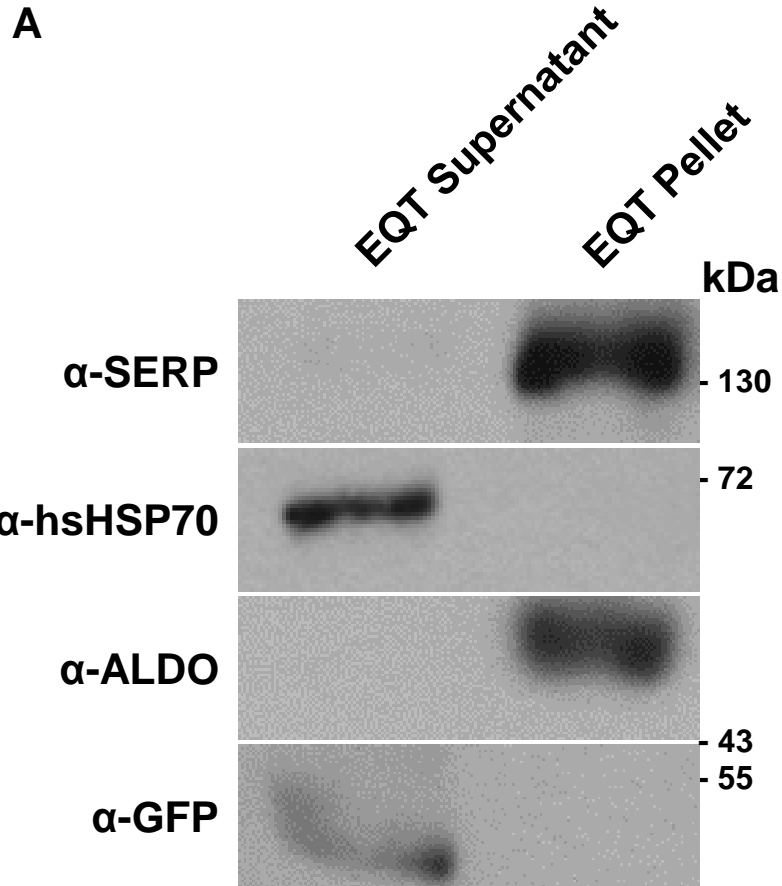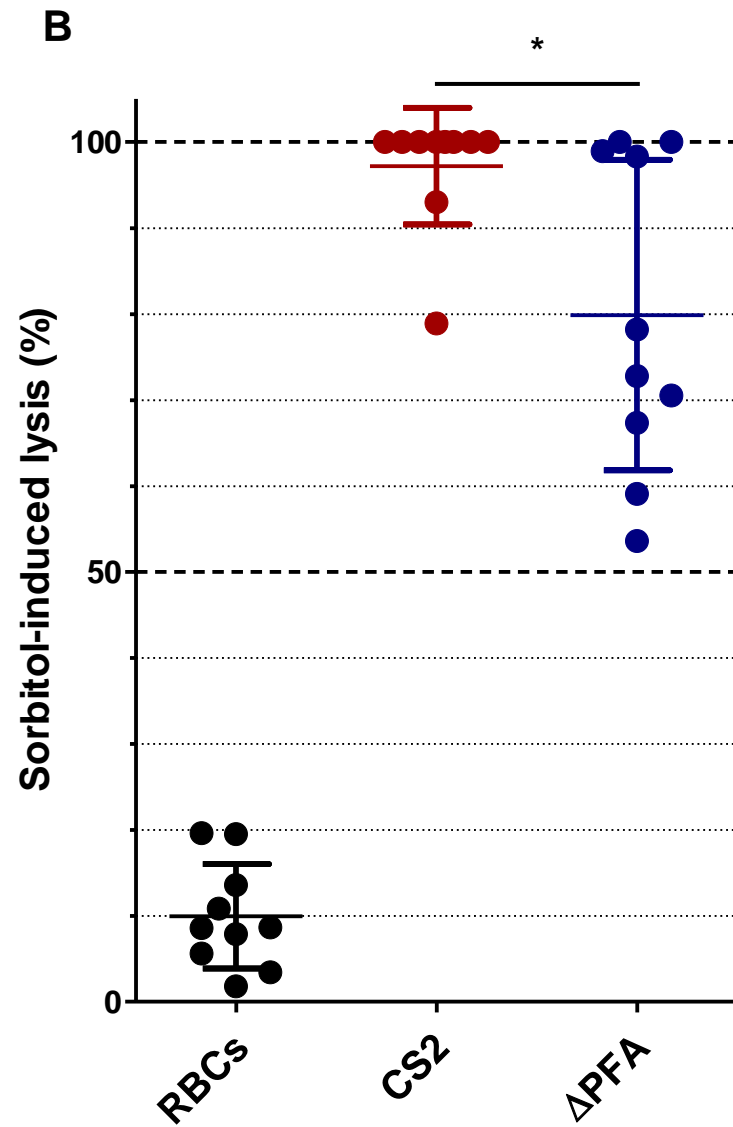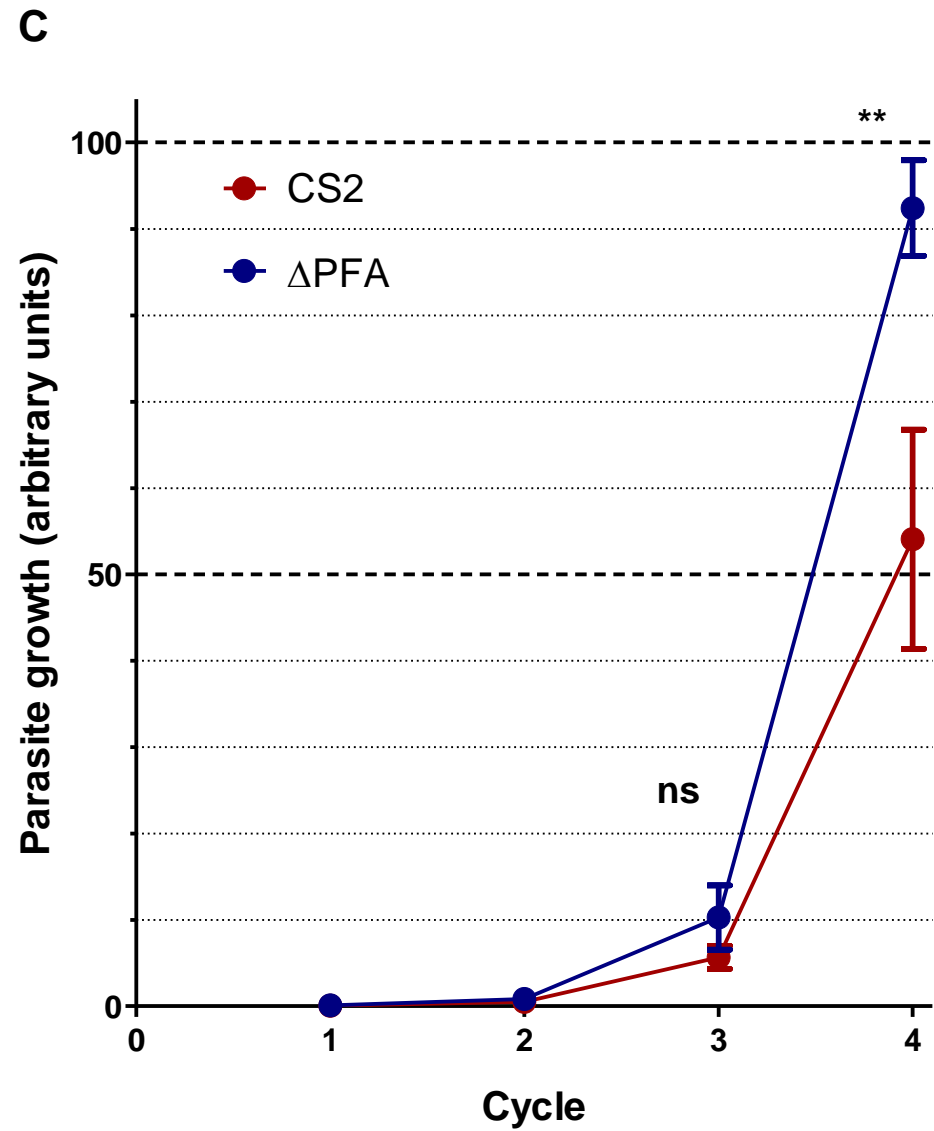

Non-infected RBC

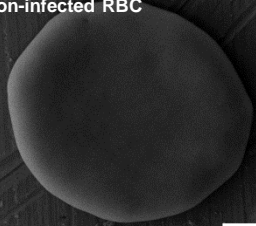

CS2

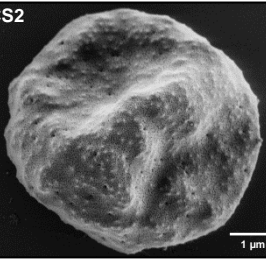

$\Delta$ PFA

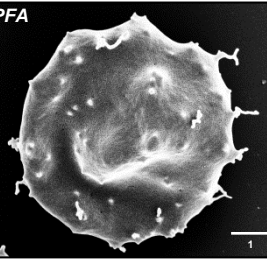

$\Delta$ PFA[PFA::HA]

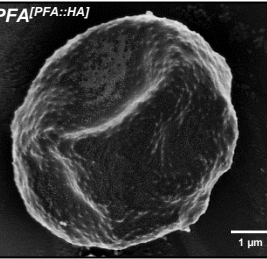

CS2

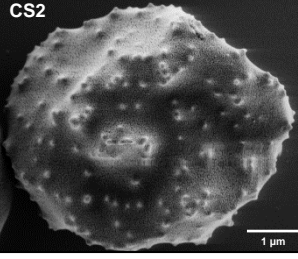

$\Delta$ PFA

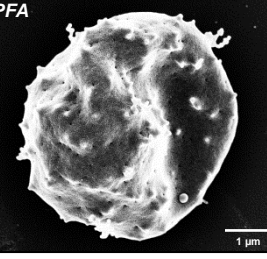

$\Delta$ PFA[PFA::HA]

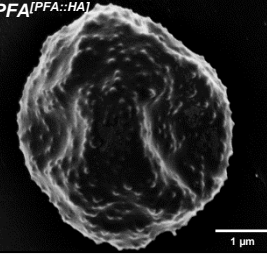

CS2

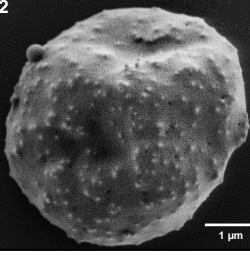

$\Delta$ PFA

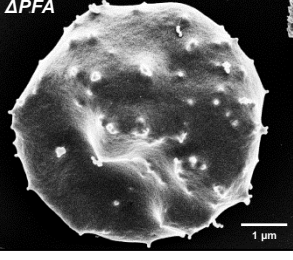

$\Delta$ PFA[PFA::HA]

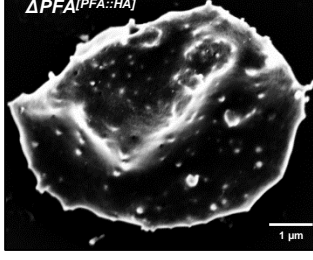

CS2

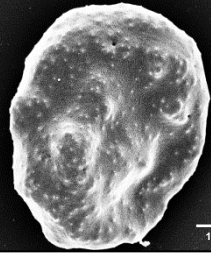

$\Delta$ PFA

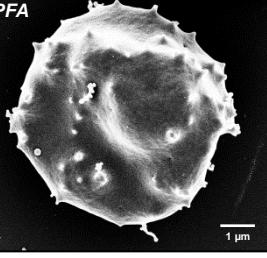

$\Delta$ PFA[PFA::HA]

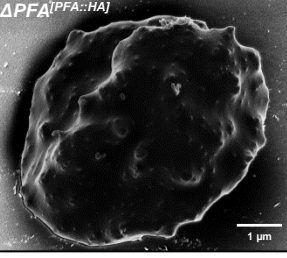

CS2

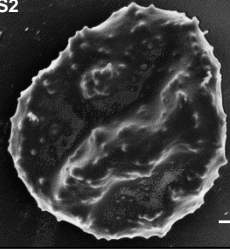

$\Delta$ PFA

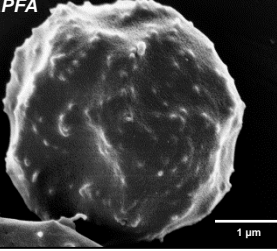

$\Delta$ PFA[PFA::HA]

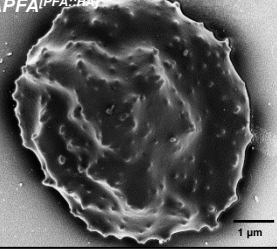





**CS2** **$\Delta$ PFA**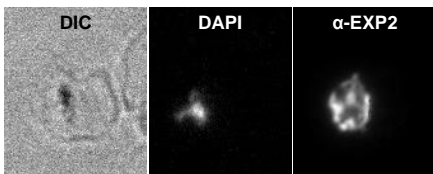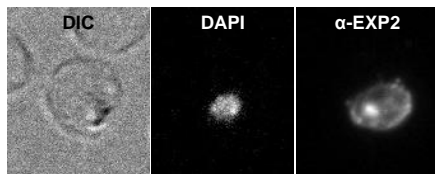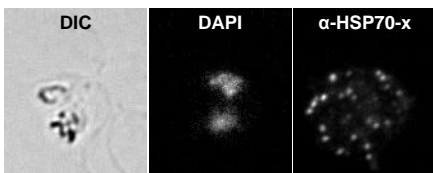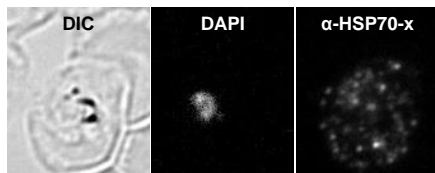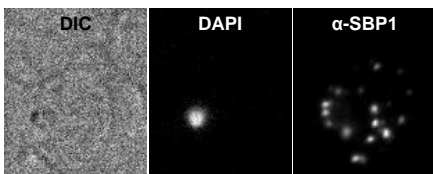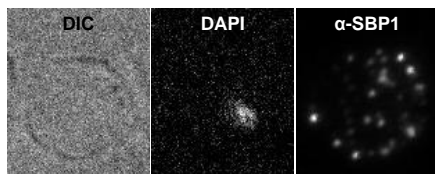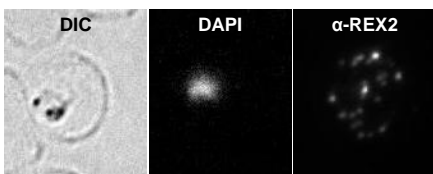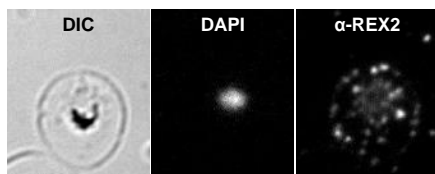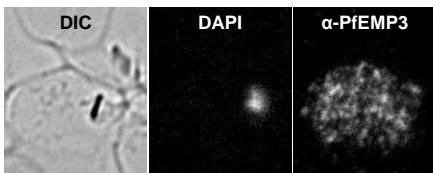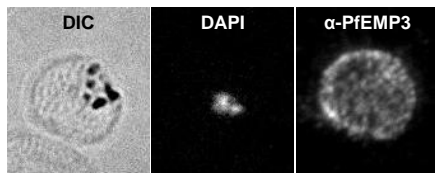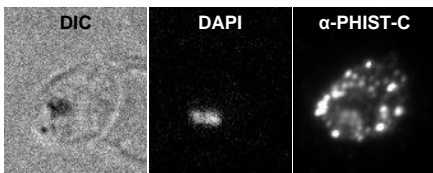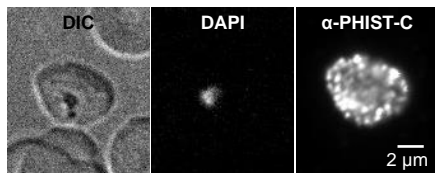

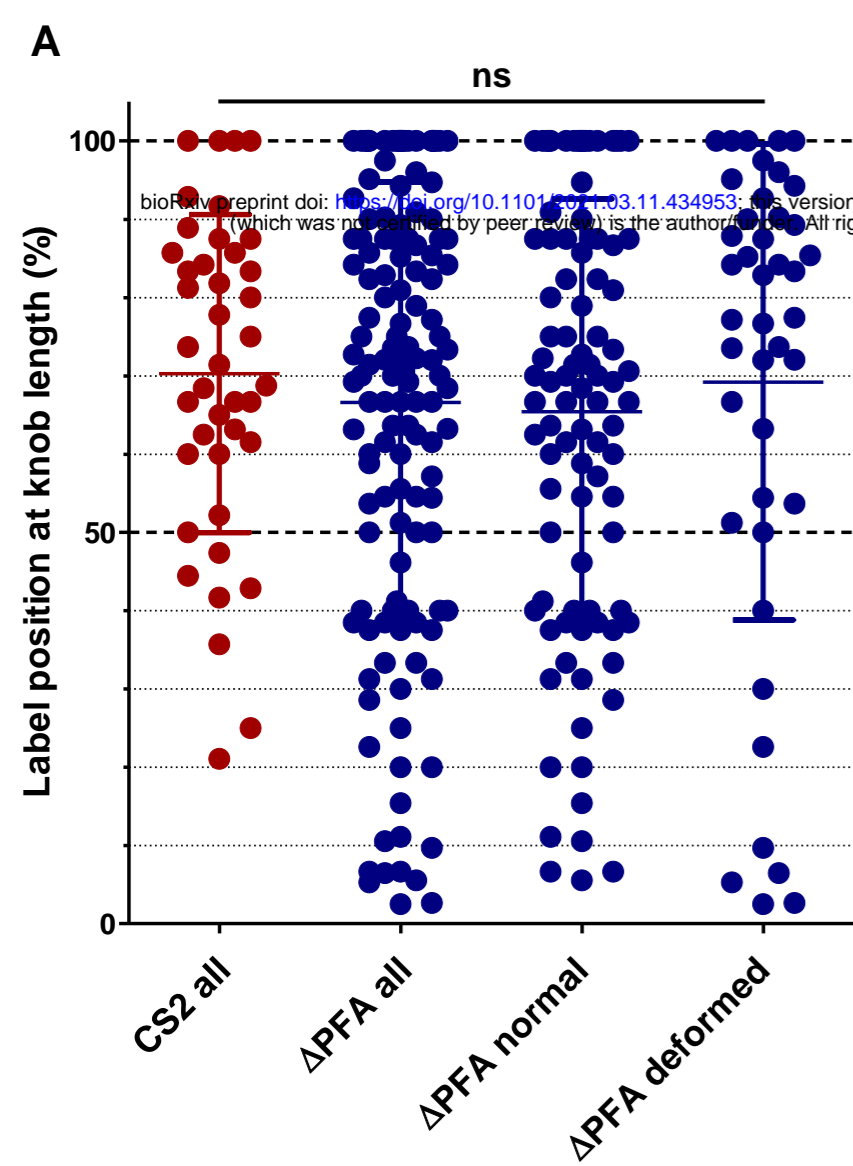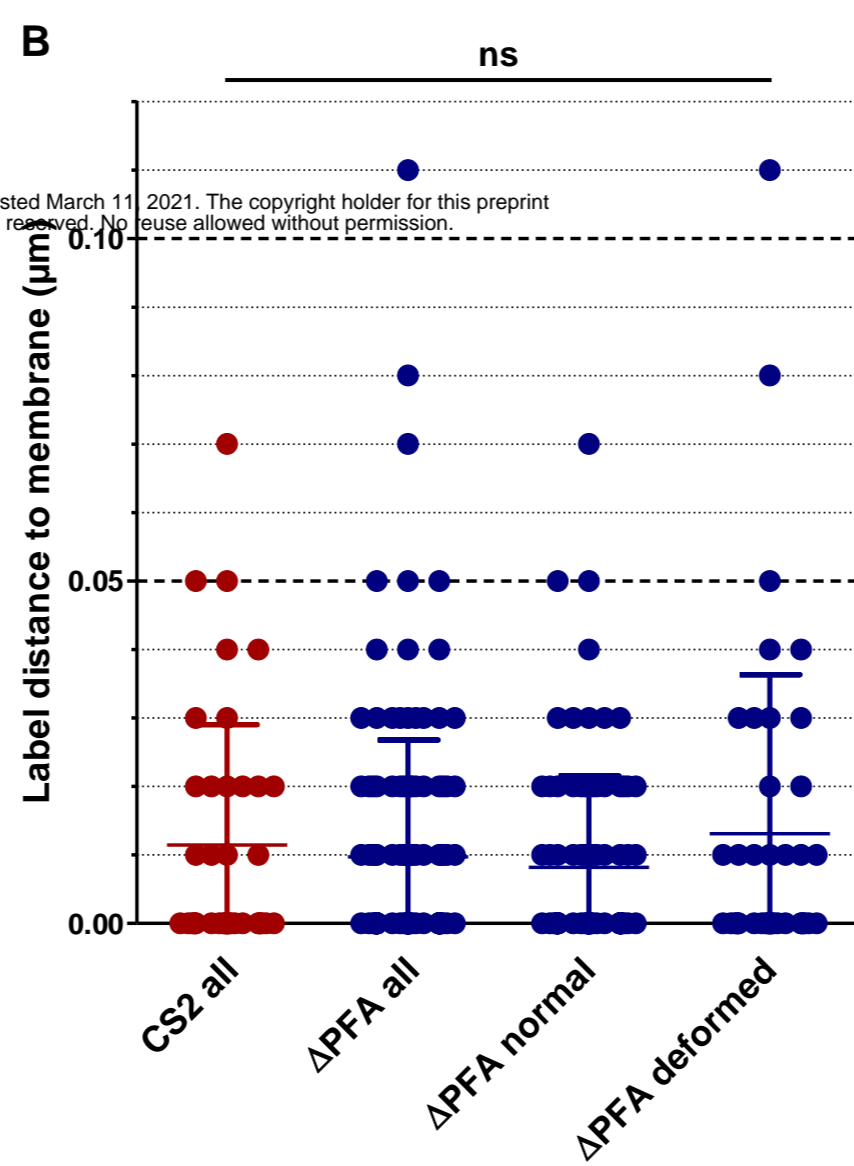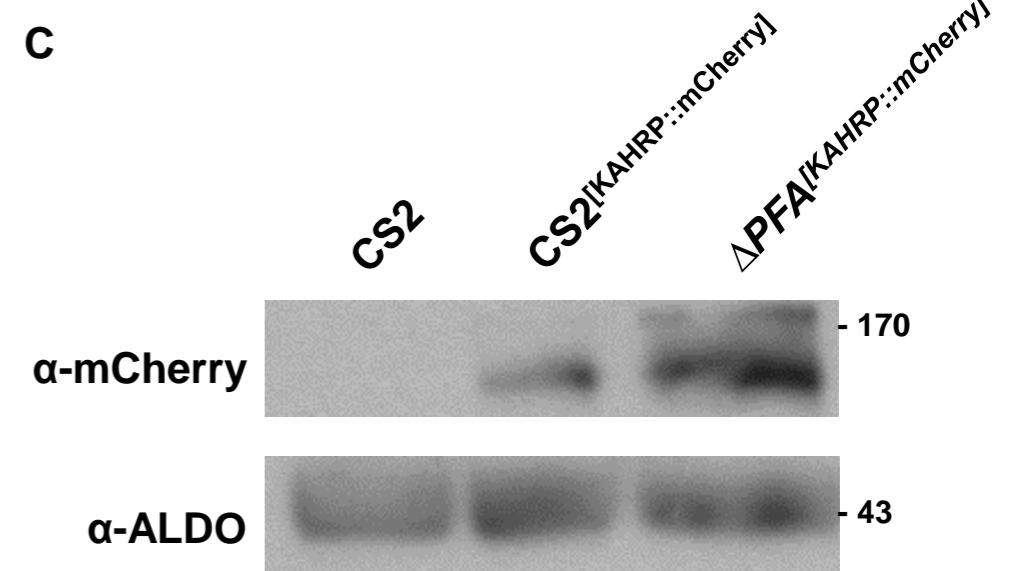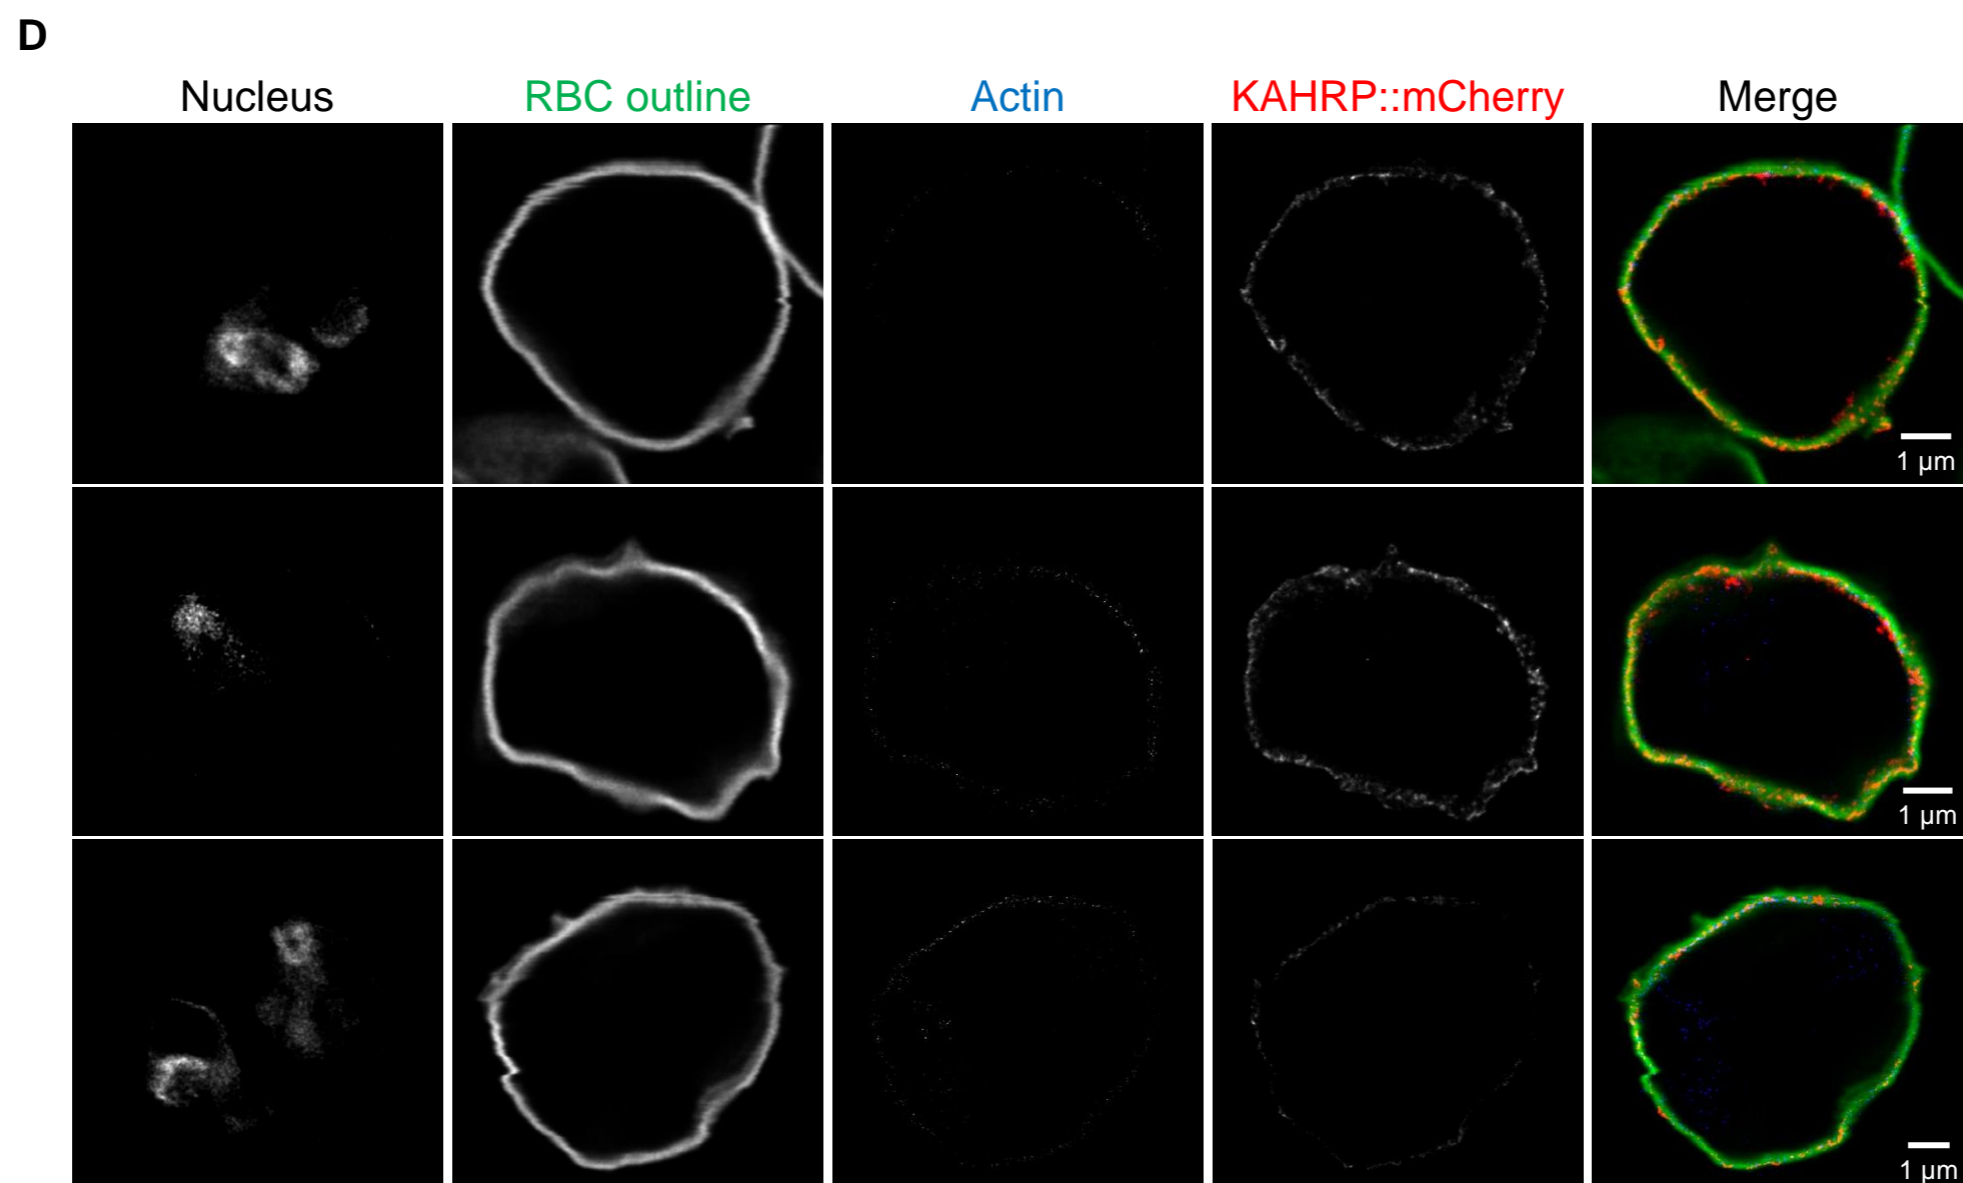

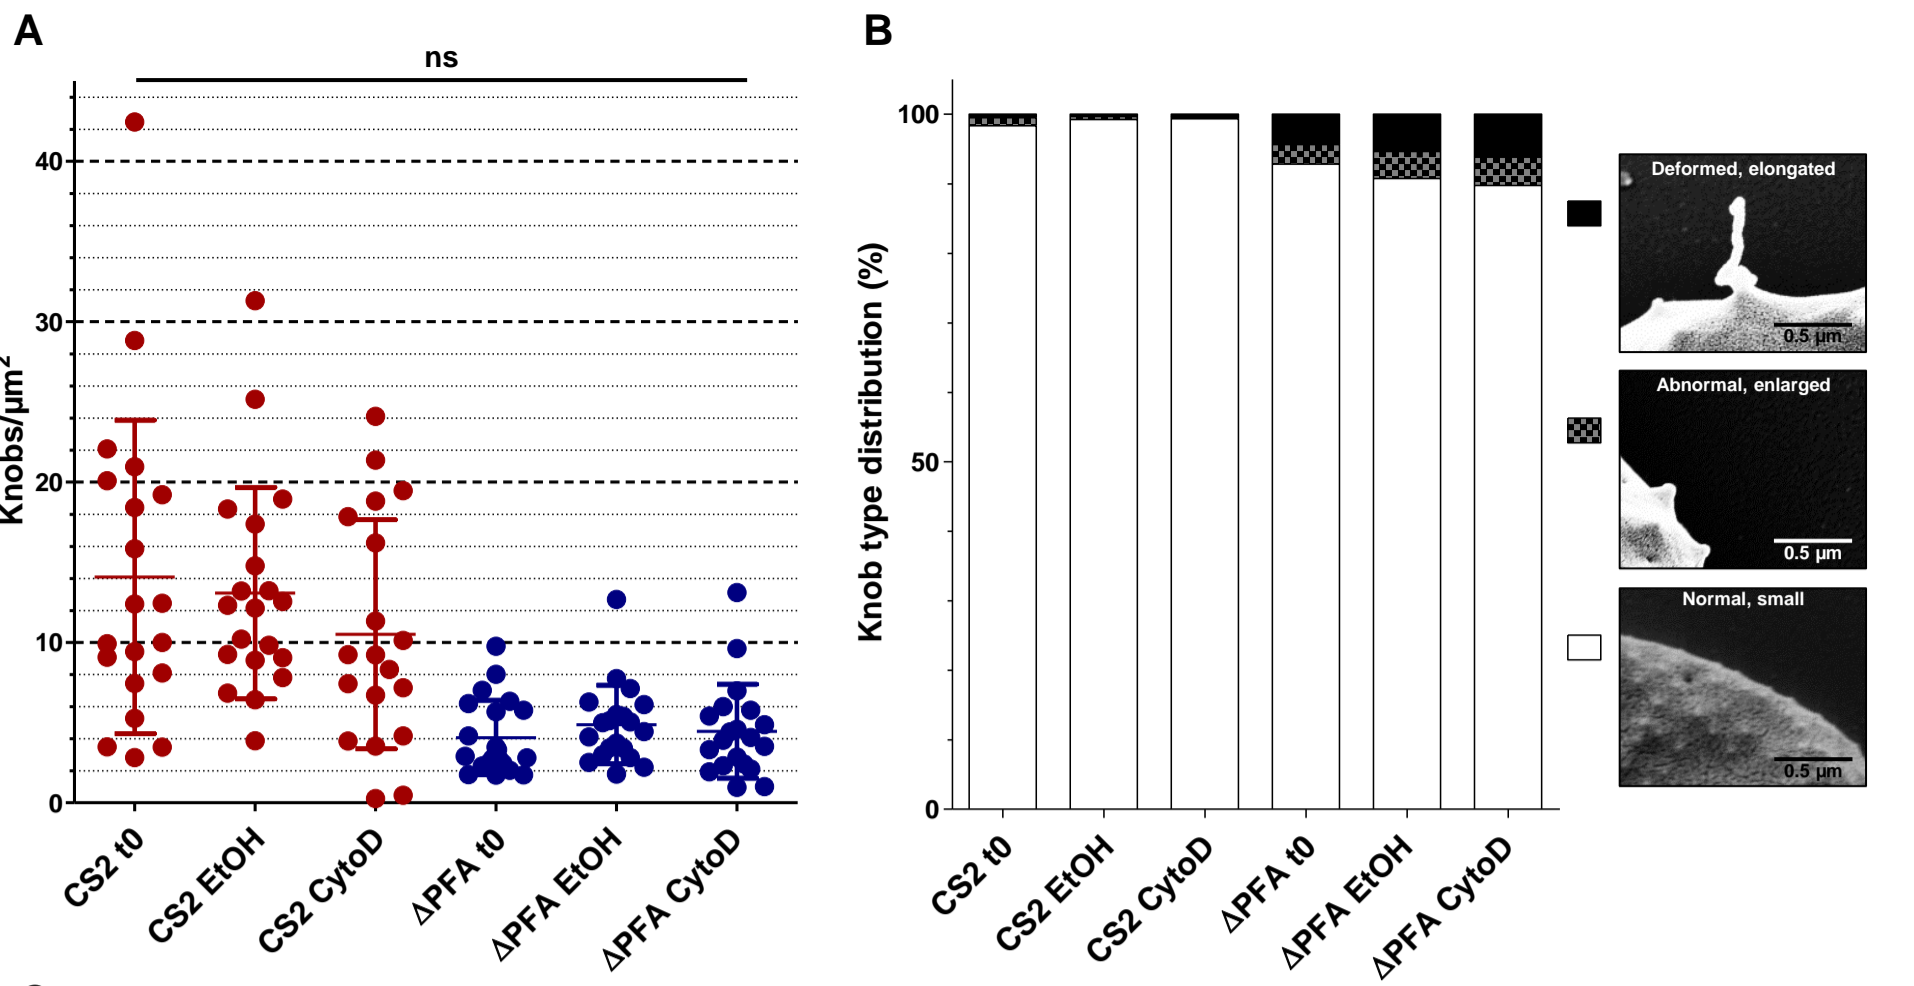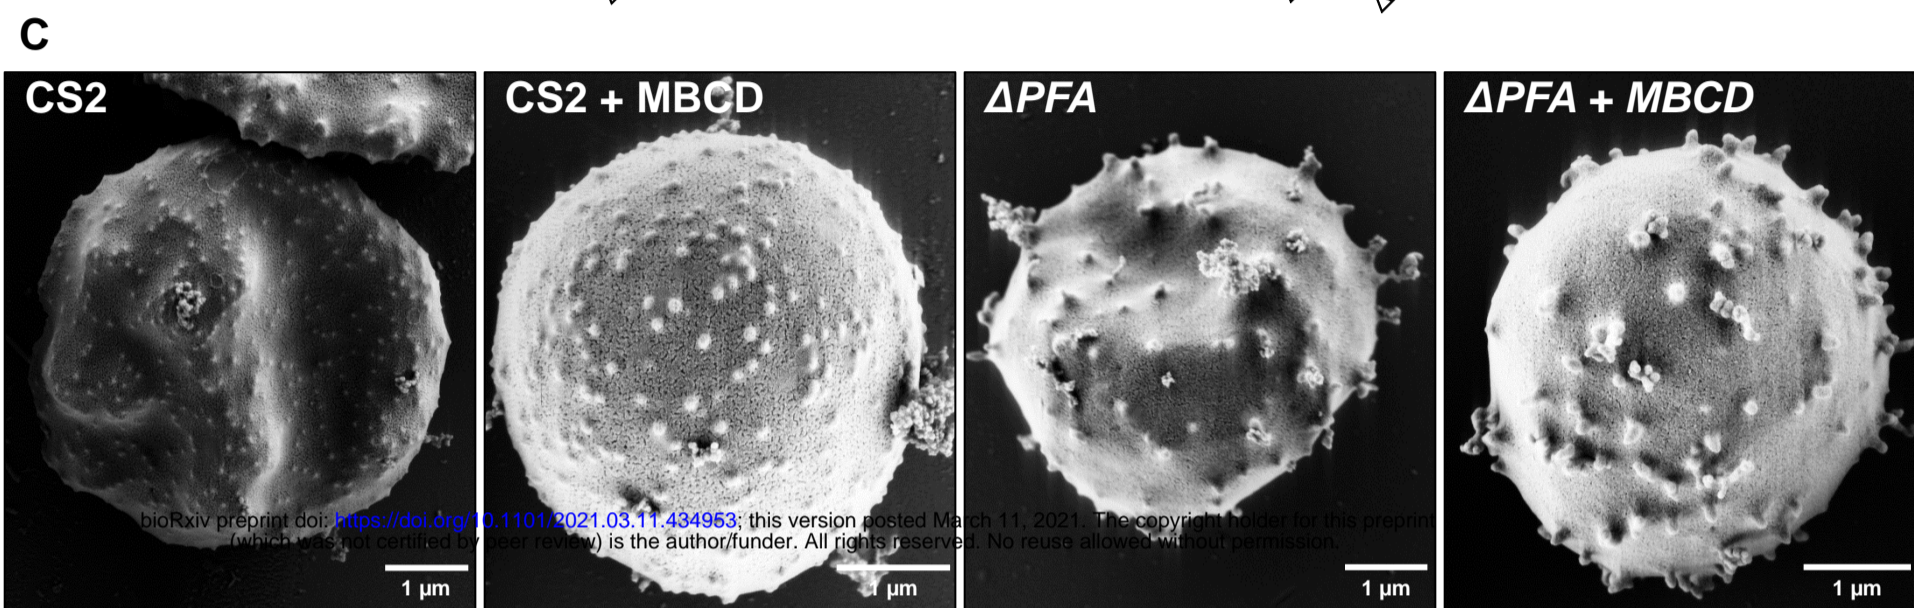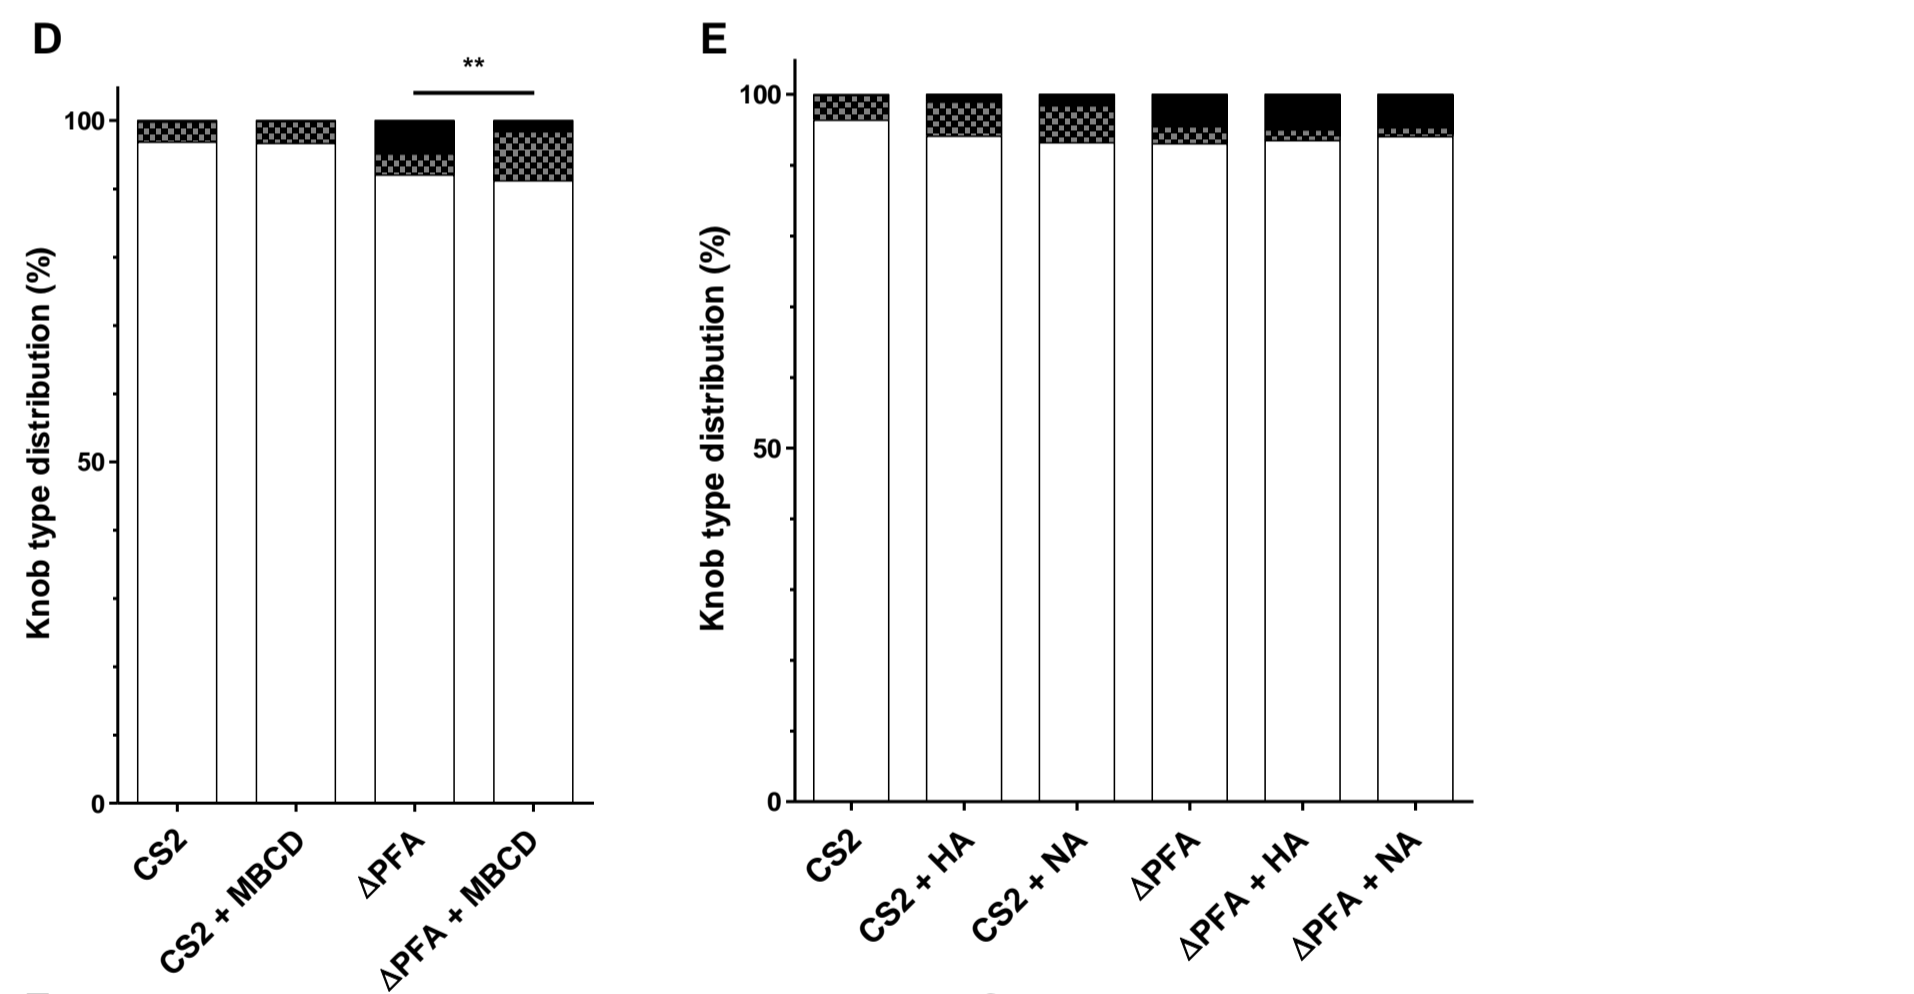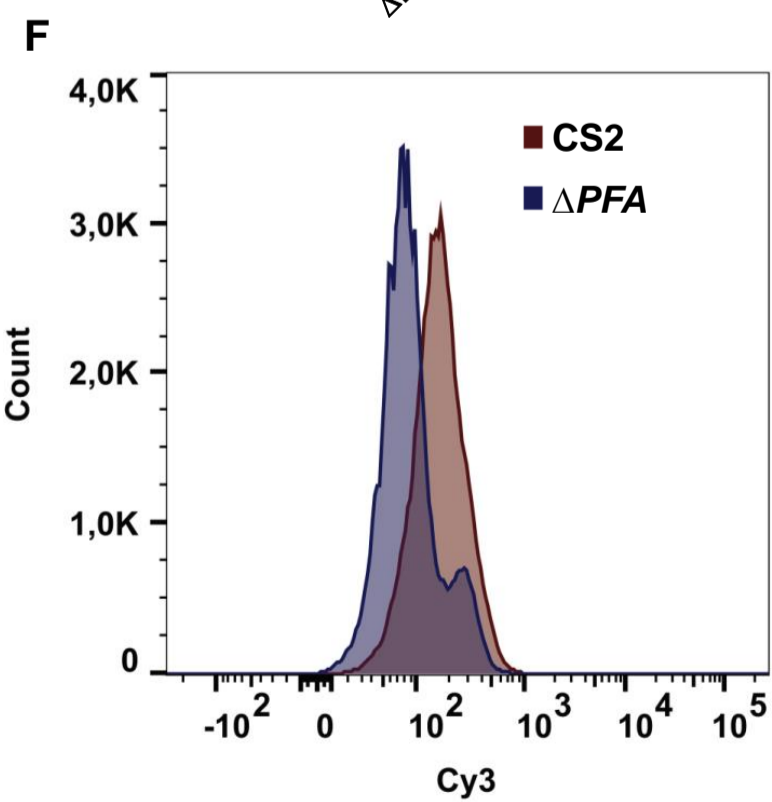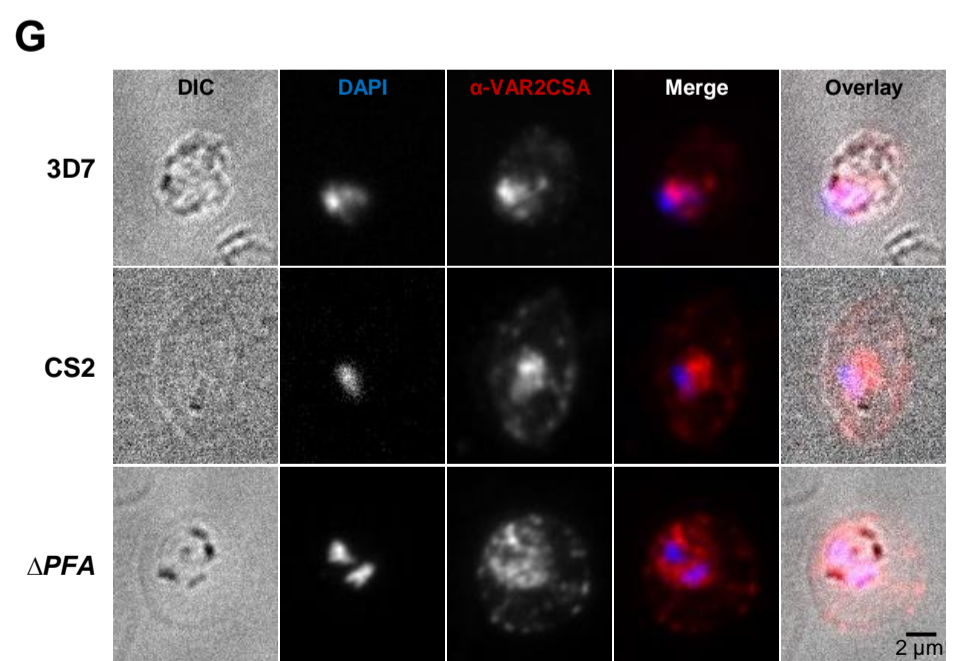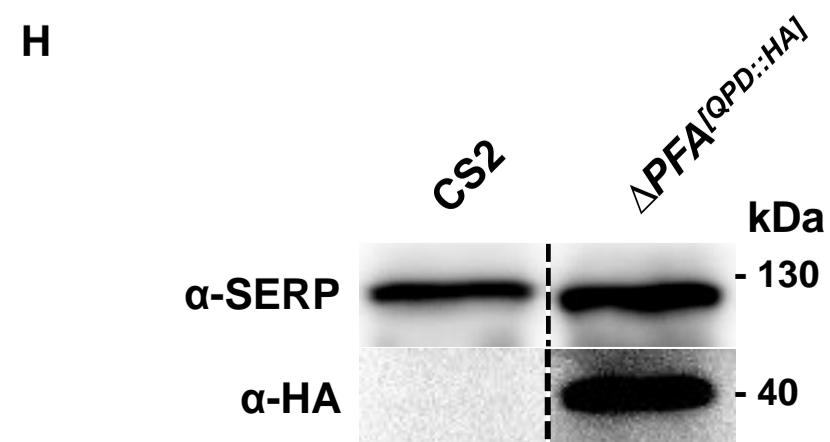

Source: https://www.biorxiv.org/content/10.1101/2021.03.11.434953v1.full.pdf
